# Supplementary material for: Gene Regulatory Networks of Penicillium echinulatum 2HH and Penicillium oxalicum 114-2 Inferred by a Computational Biology Approach
Source: Frontiers journal article supplement (doi:10.3389/fmicb.2020.588263), 2020-10-27
Supplement: Table_1.XLSX [file Table_1.XLSX]

## Sheet: Summary
Table S1 Transcription Factor Domains Distribution
Domain Type	Family_Name	Pfam	InterPro	Penicillium echinulatum 2HH	Penicillium oxalicum 114-2	Aspergillus nidulans FGSC A4	Neurospora crassa OR74A	Saccharomyces cerevisiae S288C
Fungal Zn(2)-Cys(6) binuclear cluster domain	Zn2Cys6	PF00172	IPR001138	230	206	323	124	55
Zinc finger C2H2-type	C2H2 ZF	PF00096	IPR013087	73	80	77	91	50
RNA recognition motif domain	RRM	PF00076	IPR000504	68	68	67	69	54
BZIP domain	bZIP	PF00170	IPR004827	20	21	18	20	13
Myb/SANT DNA-binding domain	Myb	PF00249	IPR001005	19	18	21	21	18
Zinc finger CCCH-type	CCCH ZF	PF00642	IPR000571	16	17	13	16	10
Helix-loop-helix DNA-binding domain	bHLH	PF00010	IPR011598	10	11	13	14	8
High mobility group (HMG) box domain	Sox	PF00505	IPR009071	6	7	7	11	8
Zinc finger GATA-type	GATA	PF00320	IPR000679	6	6	6	6	10
Homeobox domain	Homeodomain	PF00046	IPR001356	6	6	6	7	9
Forkhead domain	Forkhead	PF00250	IPR001766	4	4	6	3	4
APSES DNA-binding domain	APSES	PF04383	IPR018004	4	4	4	4	4
Heat shock factor (HSF)-type DNA-binding	HSF	PF00447	IPR000232	3	3	3	3	5
AT hook DNA-binding motif	AT hook	PF02178	IPR017956	3	3	2	5	1
Copper fist DNA-binding domain	Copper fist	PF00649	IPR001083	3	3	2	2	3
NDT80 / PhoG like DNA-binding family	Ndt80/PhoG	PF05224	IPR024061	2	2	2	3	1
ARID/BRIGHT DNA-binding domain	ARID/BRIGHT	PF01388	IPR001606	2	2	2	4	2
RFX DNA-binding domain	RFX	PF02257	IPR003150	2	2	2	2	2
MADS-box	MADS box	PF00319	IPR002100	2	2	1	2	4
Zinc finger NF-X1-type	NFX	PF01422	IPR000967	2	2	1	1	1
Pipsqueak	Pipsqueak	PF05225		1	2	3	2	0
Zinc finger BED-type	BED ZF	PF02892	IPR003656	1	1	1	1	2
CCAAT-binding TF NFYA/HAP2 subunit	HAP2	PF02045	IPR001289	1	1	1	1	1
STE	STE	PF02200	IPR003120	1	1	1	1	1
TATA-box binding protein	TBP	PF00352	IPR000814	1	1	1	1	1
TEA/ATTS domain family	TEA	PF01285	IPR000818	1	1	1	1	1
Grainyhead	Grainyhead	PF04516	IPR007604	1	1	1	1	0
CENPB	CENPB	PF04218		1	1	1	0	0
FAR1 DNA binding domain	FAR1	PF03101	IPR004330	1	0	1	2	0
MATalpha_HMGbox	MATalpha_HMGbox	PF04769	IPR006856	1	0	1	1	2
Ets	Ets	PF00178	IPR000418	0	1	0	0	0
Cold-shock DNA-binding protein	CSD	PF00313	IPR002059	0	0	1	0	0
GCR1	GCR1	PF12550	IPR022210	0	0	0	0	5
AFT	AFT	PF08731	IPR014842	0	0	0	0	2
VHR1	VHR1	PF04001	IPR007147	0	0	0	0	2
ABF1	ABF1	PF04684		0	0	0	0	1
Rap1 DNA-binding domain	Rap1	PF09197	IPR015280	0	0	0	0	1
Sum of domains				491	477	589	419	281
TF count				478	463
				13 TFs containing multiple domains	14 TFs containing multiple domains
				Zn2Cys6 + C2H2_ZF (5) Homeodomain + C2H2_ZF (1) BED_ZF + C2H2_ZF (1) STE + C2H2_ZF (1) CCCH_ZF + NFX (1) RRM + CCCH_ZF (3) RRM + Zn2Cys6 (1)	Zn2Cys6 + C2H2_ZF (7) Homeodomain + C2H2_ZF (1) BED_ZF + C2H2_ZF (1) STE + C2H2_ZF (1) CCCH_ZF + NFX (1) RRM + CCCH_ZF (3)

## Sheet: Penicillium sp. nov. 2HH
Locus tag	Gene names	Protein names	Cross-reference (Pfam)	Cross-reference (InterPro)	Cross-reference (GO)
PECH_000044		Uncharacterized protein	PF00076.22	IPR000504;IPR012677;IPR035979	GO:0003676
PECH_000052		Forkhead transcription factor sep1-like protein	PF00250.18	IPR001766;IPR018122;IPR030456;IPR036388;IPR036390	GO:0003700;GO:0006355;GO:0043565
PECH_000066		Fungal Zn(2)-Cys(6) binuclear cluster domain-containing protein	PF11951.8	IPR021858;IPR001138;IPR036864	GO:0006355;GO:0008270;GO:0000981;GO:0005634
PECH_000114		Fungal Zn(2)-Cys(6) binuclear cluster domain-containing protein	PF04082.18;PF00172.18	IPR001138;IPR007219;IPR036864	GO:0000981;GO:0003677;GO:0005634;GO:0006351;GO:0006355;GO:0008270
PECH_000120		Uncharacterized protein	PF00076.22	IPR000504;IPR012677;IPR035979	GO:0003676
PECH_000155		Zinc finger C2H2 type domain-containing protein	PF04082.18	IPR007219;IPR013087;IPR036236	GO:0003676;GO:0003677;GO:0005634;GO:0006351;GO:0008270
PECH_000182		Zinc finger C2H2 type domain-containing protein	PF00096.26;PF04082.18	IPR013087;IPR007219;IPR036236	GO:0006351;GO:0003676;GO:0003677;GO:0008270;GO:0005634
PECH_000210		Fungal Zn(2)-Cys(6) binuclear cluster domain-containing protein	PF04082.18;PF00172.18	IPR001138;IPR007219;IPR036864	GO:0006355;GO:0006351;GO:0000981;GO:0008270;GO:0003677;GO:0005634
PECH_000214		Eukaryotic translation initiation factor 3 subunit B	PF08662.11;PF00076.22	IPR000504;IPR011400;IPR012677;IPR013979;IPR015943;IPR034363;IPR035979	GO:0003676;GO:0003723;GO:0003743;GO:0005515;GO:0005852;GO:0006413;GO:0031369
PECH_000216		RING-type E3 ubiquitin transferase	PF13920.6	IPR001841;IPR013083;IPR013087	GO:0003676
PECH_000232		Cutinase transcription factor 1 alpha	PF04082.18;PF00172.18	IPR001138;IPR007219;IPR036864	GO:0000981;GO:0003677;GO:0005634;GO:0006351;GO:0006355;GO:0008270
PECH_000254		Fungal Zn(2)-Cys(6) binuclear cluster domain-containing protein	PF11951.8;PF00172.18	IPR001138;IPR021858;IPR036864	GO:0000981;GO:0005634;GO:0006355;GO:0008270
PECH_000272		Arabinolytic transcriptional activator	PF04082.18;PF00172.18	IPR001138;IPR007219;IPR036864	GO:0000981;GO:0003677;GO:0005634;GO:0006351;GO:0006355;GO:0008270
PECH_000278		Fungal Zn(2)-Cys(6) binuclear cluster domain-containing protein	PF00172.18;PF04082.18	IPR001138;IPR007219;IPR036864	GO:0000981;GO:0003677;GO:0005634;GO:0006351;GO:0006355;GO:0008270
PECH_000300		Uncharacterized protein	PF00076.22	IPR000504;IPR012677;IPR035979	GO:0003676
PECH_000305		Uncharacterized protein	PF00076.22	IPR000504;IPR006529;IPR012677;IPR035979	GO:0003676;GO:0003723;GO:0005634;GO:0006397
PECH_000310		Fungal Zn(2)-Cys(6) binuclear cluster domain-containing protein	PF00172.18	IPR001138;IPR036864	GO:0000981;GO:0005634;GO:0006355;GO:0008270
PECH_000319		Spliceosome-associated protein	PF00076.22	IPR000504;IPR012677;IPR034158;IPR034159;IPR035979	GO:0003676
PECH_000338		Asparagine-rich zinc finger protein Azf1-like protein	PF00096.26	IPR013087;IPR036236	GO:0003676
PECH_000352		Sexual development transcription factor NsdD-like protein	PF00320.27	IPR000679;IPR013088;IPR039355	GO:0003700;GO:0006355;GO:0008270;GO:0043565
PECH_000356		Cell division cycle-related protein res2/pct1	PF00023.30;PF04383.13	IPR002110;IPR003163;IPR018004;IPR020683;IPR029793;IPR036770;IPR036887	GO:0000083;GO:0003677;GO:0005515;GO:0030907
PECH_000370		Zinc finger C2H2 type domain-containing protein		IPR013087	GO:0003676
PECH_000377		BZIP transcription factor		IPR004827	GO:0003700;GO:0006355
PECH_000384		Fungal Zn(2)-Cys(6) binuclear cluster domain-containing protein	PF11951.8;PF00172.18	IPR001138;IPR021858;IPR036864	GO:0000981;GO:0005634;GO:0006355;GO:0008270
PECH_000391		Zinc finger C2H2 type domain-containing protein	PF04082.18	IPR007219;IPR013087;IPR036236	GO:0003676;GO:0003677;GO:0005634;GO:0006351;GO:0008270
PECH_000393		Fungal Zn(2)-Cys(6) binuclear cluster domain-containing protein	PF00172.18	IPR001138;IPR036864	GO:0000981;GO:0005634;GO:0006355;GO:0008270
PECH_000405		Uncharacterized protein	PF00076.22	IPR000504;IPR012677;IPR035979	GO:0003676
PECH_000416		Fungal Zn(2)-Cys(6) binuclear cluster domain-containing protein		IPR001138	GO:0000981;GO:0005634;GO:0006355;GO:0008270
PECH_000422		Uncharacterized protein		IPR000571	GO:0046872
PECH_000441		BZIP transcription factor	PF07716.15	IPR004827	GO:0003700;GO:0006355
PECH_000471		Zinc finger C2H2 type domain-containing protein	PF00096.26	IPR013087;IPR036236	GO:0003676
PECH_000487		Acetate utilization protein FacB-like protein	PF04082.18;PF00172.18	IPR001138;IPR007219;IPR036864	GO:0000981;GO:0003677;GO:0005634;GO:0006351;GO:0006355;GO:0008270
PECH_000507		Copper-activated transcription factor	PF00649.18	IPR001083;IPR036395	GO:0003677;GO:0003700;GO:0005507;GO:0005634;GO:0006355
PECH_000544		Fungal Zn(2)-Cys(6) binuclear cluster and zinc finger C2H2 domain-containing protein	PF00096.26;PF04082.18;PF00172.18	IPR001138;IPR007219;IPR013087;IPR036236;IPR036864	GO:0000981;GO:0003676;GO:0003677;GO:0005634;GO:0006351;GO:0006355;GO:0008270
PECH_000559		Zinc finger C2H2 type domain-containing protein		IPR013087;IPR036236	GO:0003676
PECH_000587		Zinc finger C2H2 transcription factor Ace1-like protein		IPR013087	GO:0003676
PECH_000594		Fungal Zn(2)-Cys(6) binuclear cluster domain-containing protein	PF04082.18	IPR001138;IPR007219;IPR036864	GO:0000981;GO:0003677;GO:0005634;GO:0006351;GO:0006355;GO:0008270
PECH_000633		Cross-pathway control protein A	PF07716.15	IPR004827	GO:0003700;GO:0006355
PECH_000649		HMG box transcriptional regulator ste11	PF00505.19	IPR009071;IPR036910
PECH_000669		Fungal Zn(2)-Cys(6) binuclear cluster domain-containing protein	PF04082.18;PF00172.18	IPR001138;IPR007219;IPR036864	GO:0000981;GO:0003677;GO:0005634;GO:0006351;GO:0006355;GO:0008270
PECH_000703		Fungal Zn(2)-Cys(6) binuclear cluster domain-containing protein	PF00172.18	IPR001138;IPR036864	GO:0000981;GO:0005634;GO:0006355;GO:0008270
PECH_000725		Fungal Zn(2)-Cys(6) binuclear cluster domain-containing protein	PF00172.18	IPR001138	GO:0005634;GO:0000981;GO:0008270;GO:0006355
PECH_000766		Fungal Zn(2)-Cys(6) binuclear cluster domain-containing protein	PF00172.18;PF11951.8	IPR021858;IPR001138;IPR036864	GO:0006355;GO:0008270;GO:0000981;GO:0005634
PECH_000801		Fungal Zn(2)-Cys(6) binuclear cluster domain-containing protein	PF00172.18	IPR001138;IPR036864	GO:0006355;GO:0000981;GO:0008270;GO:0005634
PECH_000802		Cyclophilin-type peptidylprolyl cis-trans isomerase	PF00160.21;PF00076.22	IPR000504;IPR002130;IPR012677;IPR024936;IPR029000;IPR035538;IPR035542;IPR035979	GO:0000413;GO:0003676;GO:0003755
PECH_000808		RNA binding protein involved in regulation of arginine catabolism	PF00076.22	IPR000504;IPR012677;IPR035979	GO:0003676
PECH_000820		Fungal Zn(2)-Cys(6) binuclear cluster domain-containing protein	PF00172.18	IPR001138;IPR036864	GO:0000981;GO:0005634;GO:0006355;GO:0008270
PECH_000859		Maltose fermentation regulator MalR-like protein	PF00172.18;PF04082.18	IPR001138;IPR007219;IPR036864	GO:0000981;GO:0003677;GO:0005634;GO:0006351;GO:0006355;GO:0008270
PECH_000872		RNA splicing factor, CC1-like, family protein	PF00076.22;PF15519.6	IPR000504;IPR006509;IPR012677;IPR029123;IPR035979	GO:0003676;GO:0003723;GO:0005634;GO:0006397
PECH_000879		BZIP transcription factor	PF00170.21	IPR004827	GO:0003700;GO:0006355
PECH_000888		Fungal Zn(2)-Cys(6) binuclear cluster domain-containing protein	PF00172.18	IPR001138;IPR036864	GO:0000981;GO:0005634;GO:0006355;GO:0008270
PECH_000896		Nitrogen assimilation transcription factor	PF04082.18;PF00172.18	IPR001138;IPR007219;IPR036864	GO:0000981;GO:0003677;GO:0005634;GO:0006351;GO:0006355;GO:0008270
PECH_000918		Lysine-specific histone demethylase 1	PF01593.24;PF04433.17;PF09011.10	IPR009071;IPR007526;IPR002937;IPR036910;IPR036188;IPR036388;IPR009057	GO:0003677;GO:0005515;GO:0016491;GO:0055114
PECH_000920		Smr domain-containing protein	PF08590.10;PF01713.21	IPR000571;IPR002625;IPR013899;IPR036063;IPR036855	GO:0046872
PECH_000950		Fungal Zn(2)-Cys(6) binuclear cluster domain-containing protein		IPR001138	GO:0000981;GO:0005634;GO:0006355;GO:0008270
PECH_000955		Zinc finger C2H2 type and BED type domain-containing protein		IPR003656;IPR013087	GO:0003676;GO:0003677
PECH_000962		Fungal Zn(2)-Cys(6) binuclear cluster domain-containing protein	PF04082.18;PF00172.18	IPR001138;IPR007219;IPR036864	GO:0000981;GO:0003677;GO:0005634;GO:0006351;GO:0006355;GO:0008270
PECH_000975		Uncharacterized protein	PF00076.22	IPR000504;IPR012677;IPR035979	GO:0003676
PECH_000979		Fungal Zn(2)-Cys(6) binuclear cluster domain-containing protein	PF00172.18	IPR001138;IPR036864	GO:0000981;GO:0005634;GO:0006355;GO:0008270
PECH_000980		GATA transcription factor LreA-like protein	PF13426.7;PF08447.12;PF00320.27	IPR000014;IPR000679;IPR001610;IPR013088;IPR013655;IPR035965	GO:0005515;GO:0006355;GO:0008270;GO:0043565
PECH_000991		Fungal Zn(2)-Cys(6) binuclear cluster domain-containing protein	PF04082.18;PF00172.18	IPR001138;IPR007219;IPR036864	GO:0000981;GO:0003677;GO:0005634;GO:0006351;GO:0006355;GO:0008270
PECH_001023		Zinc finger C2H2 type domain-containing protein	PF00096.26	IPR013087;IPR036236	GO:0003676
PECH_001090		L-rhamnose-responsive regulator	PF04082.18;PF00172.18	IPR001138;IPR007219;IPR036864	GO:0000981;GO:0003677;GO:0005634;GO:0006351;GO:0006355;GO:0008270
PECH_001169		BZIP transcription factor	PF00170.21	IPR004827	GO:0006355;GO:0003700
PECH_001186		MYB family conidiophore development protein FlbD-like protein	PF00249.31	IPR001005;IPR009057;IPR017930	GO:0003677
PECH_001198		Zinc finger C2H2 type domain-containing protein		IPR013087;IPR036236	GO:0003676
PECH_001199		Zinc finger C2H2 type domain-containing protein	PF00096.26	IPR013087;IPR036236	GO:0003676
PECH_001200		ARID DNA-binding domain-containing protein	PF01388.21	IPR001606;IPR036431	GO:0003677
PECH_001228		CP2 transcription factor	PF04516.15	IPR040167;IPR007604	GO:0006357;GO:0003700
PECH_001256		Inulinolytic regulator InuR-like protein	PF00172.18;PF04082.18	IPR001138;IPR007219;IPR036864	GO:0000981;GO:0003677;GO:0005634;GO:0006351;GO:0006355;GO:0008270
PECH_001293		KIN17-like protein	PF10357.9;PF12874.7	IPR013087;IPR019447;IPR036236;IPR037321;IPR038254	GO:0003676
PECH_001297		U2 auxiliary factor small subunit family protein	PF00642.24	IPR000504;IPR000571;IPR009145;IPR012677;IPR035979	GO:0000398;GO:0003676;GO:0003723;GO:0046872;GO:0089701
PECH_001325		Fungal Zn(2)-Cys(6) binuclear cluster domain-containing protein	PF11951.8;PF00172.18	IPR001138;IPR021858;IPR036864	GO:0000981;GO:0005634;GO:0006355;GO:0008270
PECH_001376		Homeobox transcription factor AhpA-like protein	PF05920.11	IPR001356;IPR008422;IPR009057	GO:0003677;GO:0006355
PECH_001378		Transcriptional activator of proteases PrtT-like protein	PF00172.18	IPR001138;IPR036864	GO:0000981;GO:0005634;GO:0006355;GO:0008270
PECH_001380		Amylolytic gene expression activator	PF04082.18;PF00172.18	IPR001138;IPR007219;IPR036864	GO:0000981;GO:0003677;GO:0005634;GO:0006351;GO:0006355;GO:0008270
PECH_001383		Fungal Zn(2)-Cys(6) binuclear cluster domain-containing protein		IPR001138	GO:0000981;GO:0005634;GO:0006355;GO:0008270
PECH_001421		Fungal Zn(2)-Cys(6) binuclear cluster domain-containing protein	PF04082.18;PF00172.18	IPR001138;IPR007219;IPR036864	GO:0006351;GO:0006355;GO:0003677;GO:0008270;GO:0000981;GO:0005634
PECH_001444		Fungal Zn(2)-Cys(6) binuclear cluster and zinc finger C2H2-type domain-containing protein	PF00172.18;PF04082.18;PF00096.26	IPR001138;IPR007219;IPR013087;IPR036236;IPR036864	GO:0000981;GO:0003676;GO:0003677;GO:0005634;GO:0006351;GO:0006355;GO:0008270
PECH_001558		Fungal Zn(2)-Cys(6) binuclear cluster domain-containing protein	PF04082.18;PF00172.18	IPR001138;IPR007219;IPR036864	GO:0000981;GO:0003677;GO:0005634;GO:0006351;GO:0006355;GO:0008270
PECH_001563		TATA box-binding protein	PF00352.21	IPR000814;IPR012295;IPR030491;IPR033710	GO:0003677;GO:0006352
PECH_001565		RNA recognition motif-containing protein	PF00076.22	IPR000504;IPR012677;IPR035979	GO:0003676
PECH_001568		Fungal Zn(2)-Cys(6) binuclear cluster domain-containing protein	PF04082.18;PF00172.18	IPR007219;IPR001138;IPR036864	GO:0006355;GO:0006351;GO:0008270;GO:0000981;GO:0003677;GO:0005634
PECH_001577		Quinic acid utilization activator	PF04082.18;PF00172.18	IPR007219;IPR001138;IPR036864	GO:0006355;GO:0006351;GO:0008270;GO:0000981;GO:0003677;GO:0005634
PECH_001594		SWI/SNF and RSC complexes subunit ssr2	PF04433.17;PF16495.5;PF00249.31	IPR001005;IPR007526;IPR041984;IPR009057;IPR017884;IPR032451;IPR036388	GO:0003677;GO:0005515
PECH_001595		Myb-like DNA-binding domain-containing protein		IPR001005;IPR009057	GO:0003677
PECH_001605		APSES transcription factor MbpA-like protein	PF13637.6	IPR003163;IPR018004;IPR020683;IPR036770;IPR036887	GO:0003677
PECH_001628		General transcription and DNA repair factor IIH	PF04056.14;PF07975.12	IPR002035;IPR004595;IPR007198;IPR012170;IPR013083;IPR013087;IPR036465	GO:0000439;GO:0003676;GO:0006281;GO:0006289;GO:0006351;GO:0008270
PECH_001647		Uncharacterized protein	PF05383.17;PF00076.22	IPR000504;IPR002344;IPR006630;IPR012677;IPR035979;IPR036388;IPR036390	GO:0003676;GO:0003723;GO:0005634;GO:0006396;GO:1990904
PECH_001712		Zinc finger C2H2 type domain-containing protein		IPR013087;IPR036236	GO:0003676
PECH_001755		Uncharacterized protein	PF01585.23;PF00076.22	IPR000467;IPR000504;IPR003954;IPR012677;IPR035979	GO:0003676
PECH_001758		Ubiquitin-associated domain-containing protein	PF00627.31	IPR009060;IPR013087;IPR015940;IPR029071	GO:0003676;GO:0005515
PECH_001766		Pre-mRNA branch site p14-like protein	PF00076.22	IPR000504;IPR012677;IPR034150;IPR035979	GO:0003676
PECH_001780		Fungal Zn(2)-Cys(6) binuclear cluster domain-containing protein	PF04082.18;PF00172.18	IPR001138;IPR007219;IPR036864	GO:0000981;GO:0003677;GO:0005634;GO:0006351;GO:0006355;GO:0008270
PECH_001797		Uncharacterized protein	PF00076.22	IPR000504;IPR012677;IPR034156;IPR035979	GO:0003676
PECH_001830		Zinc finger C2H2 type domain-containing protein	PF17017.5	IPR013087;IPR031514;IPR036236	GO:0003676
PECH_001850		Pre-mRNA-splicing factor	PF00076.22	IPR000504;IPR012677;IPR034403;IPR035979	GO:0003676
PECH_001863		Cellulolytic transcriptional activator ClrA-like protein	PF00172.18	IPR001138;IPR036864	GO:0000981;GO:0005634;GO:0006355;GO:0008270
PECH_001885		Nuclear cap-binding protein subunit 2	PF00076.22	IPR000504;IPR012677;IPR027157;IPR034148;IPR035979	GO:0000339;GO:0003676;GO:0005846;GO:0045292
PECH_001895		Uncharacterized protein	PF14570.6;PF00076.22	IPR000504;IPR001841;IPR003954;IPR012677;IPR013083;IPR034261;IPR035979	GO:0003676
PECH_001898		Fungal specific transcription factor involved in L-proline catabolism	PF04082.18;PF00172.18	IPR001138;IPR007219;IPR036864	GO:0000981;GO:0003677;GO:0005634;GO:0006351;GO:0006355;GO:0008270
PECH_001920		Fungal Zn(2)-Cys(6) binuclear cluster domain-containing protein	PF00076.22;PF04082.18;PF00172.18	IPR000504;IPR001138;IPR007219;IPR012677;IPR035979;IPR036864	GO:0000981;GO:0003676;GO:0003677;GO:0005634;GO:0006351;GO:0006355;GO:0008270
PECH_002009		Fungal Zn(2)-Cys(6) binuclear cluster domain-containing protein	PF04082.18	IPR001138;IPR007219	GO:0000981;GO:0003677;GO:0005634;GO:0006351;GO:0006355;GO:0008270
PECH_002021		Fungal Zn(2)-Cys(6) binuclear cluster domain-containing protein	PF00172.18	IPR001138;IPR036864	GO:0000981;GO:0005634;GO:0006355;GO:0008270
PECH_002064		RNA recognition motif-containing protein	PF00076.22	IPR000504;IPR012677;IPR024936;IPR034168;IPR035979	GO:0003676;GO:0003723;GO:0003755
PECH_002106		Fungal Zn(2)-Cys(6) binuclear cluster domain-containing protein	PF00172.18	IPR001138;IPR036864	GO:0000981;GO:0005634;GO:0006355;GO:0008270
PECH_002137		Xylanolytic and cellulolytic transcriptional activator	PF00172.18;PF04082.18	IPR001138;IPR007219;IPR036864	GO:0006355;GO:0006351;GO:0008270;GO:0000981;GO:0003677;GO:0042025;GO:0005634
PECH_002138		Cutinase transcription factor 1 beta	PF04082.18	IPR001138;IPR007219;IPR036864	GO:0000981;GO:0003677;GO:0005634;GO:0006351;GO:0006355;GO:0008270
PECH_002161		Fungal Zn(2)-Cys(6) binuclear cluster domain-containing protein	PF11951.8;PF00172.18	IPR001138;IPR021858;IPR036864	GO:0000981;GO:0005634;GO:0006355;GO:0008270
PECH_002168		Fungal Zn(2)-Cys(6) binuclear cluster domain-containing protein	PF04082.18;PF00172.18	IPR001138;IPR007219;IPR036864	GO:0006351;GO:0006355;GO:0003677;GO:0008270;GO:0000981;GO:0005634
PECH_002177		Uncharacterized protein	PF00076.22	IPR000504;IPR012677;IPR035979	GO:0003676
PECH_002193		Uncharacterized protein		IPR001357;IPR017956;IPR022047;IPR036420	GO:0003677
PECH_002204		Transcriptional regulator PacG/VIB-1	PF05224.12	IPR008967;IPR024061;IPR037141	GO:0003677;GO:0003700;GO:0006355
PECH_002214		Fungal Zn(2)-Cys(6) binuclear cluster domain-containing protein	PF00172.18;PF04082.18	IPR001138;IPR007219;IPR036864	GO:0000981;GO:0003677;GO:0005634;GO:0006351;GO:0006355;GO:0008270
PECH_002232		MADS-box transcription factor RLM1-like protein	PF00319.18	IPR002100;IPR033896;IPR036879	GO:0000977;GO:0003677;GO:0045944;GO:0046983
PECH_002264		Transcription factor IIIA	PF00096.26	IPR013087;IPR036236	GO:0003676
PECH_002275		Fungal Zn(2)-Cys(6) binuclear cluster domain-containing protein	PF00172.18	IPR001138;IPR036864	GO:0000981;GO:0005634;GO:0006355;GO:0008270
PECH_002325		Uncharacterized protein	PF00076.22	IPR000504;IPR012677;IPR035979	GO:0003676
PECH_002357		Fungal Zn(2)-Cys(6) binuclear cluster domain-containing protein	PF00172.18	IPR001138;IPR036864	GO:0000981;GO:0005634;GO:0006355;GO:0008270
PECH_002372		Fungal Zn(2)-Cys(6) binuclear cluster domain-containing protein	PF00172.18	IPR001138;IPR036864	GO:0006355;GO:0008270;GO:0000981;GO:0005634
PECH_002389		Fungal Zn(2)-Cys(6) binuclear cluster domain-containing protein	PF11951.8;PF00172.18	IPR001138;IPR021858;IPR036864	GO:0000981;GO:0005634;GO:0006355;GO:0008270
PECH_002422		Fungal Zn(2)-Cys(6) binuclear cluster domain-containing protein	PF00172.18;PF11951.8	IPR001138;IPR021858;IPR036864	GO:0000981;GO:0005634;GO:0006355;GO:0008270
PECH_002476		Transcriptional activator of proteases prtT	PF00172.18	IPR001138;IPR007219;IPR036864	GO:0006355;GO:0006351;GO:0000981;GO:0008270;GO:0003677;GO:0005634
PECH_002495		Casein kinase II subunit beta	PF00172.18;PF04082.18	IPR007219;IPR001138;IPR036864	GO:0006355;GO:0006351;GO:0000981;GO:0008270;GO:0003677;GO:0005634
PECH_002498		SANT domain-containing protein	PF00249.31	IPR001005;IPR009057;IPR017884	GO:0003677
PECH_002500		Zinc finger C2H2 type domain-containing protein	PF11917.8	IPR013087;IPR021842	GO:0003676
PECH_002509		Fungal Zn(2)-Cys(6) binuclear cluster domain-containing protein	PF11951.8;PF00172.18	IPR001138;IPR021858;IPR036864	GO:0000981;GO:0005634;GO:0006355;GO:0008270
PECH_002515		Fungal Zn(2)-Cys(6) binuclear cluster domain-containing protein	PF04082.18;PF00172.18	IPR001138;IPR007219;IPR036864	GO:0000981;GO:0003677;GO:0005634;GO:0006351;GO:0006355;GO:0008270
PECH_002552		Zinc finger C2H2 type domain-containing protein		IPR013087	GO:0003676
PECH_002554		SANT/Myb domain-containing protein		IPR001005
PECH_002560		Fungal Zn(2)-Cys(6) binuclear cluster domain-containing protein	PF00172.18;PF04082.18	IPR001138;IPR007219;IPR036864	GO:0000981;GO:0003677;GO:0005634;GO:0006351;GO:0006355;GO:0008270
PECH_002590		Fungal Zn(2)-Cys(6) binuclear cluster domain-containing protein	PF00172.18;PF11951.8	IPR001138;IPR021858;IPR036864	GO:0000981;GO:0005634;GO:0006355;GO:0008270
PECH_002624		Uncharacterized protein	PF00642.24	IPR000571;IPR036855	GO:0046872
PECH_002625		BZIP transcription factor	PF07716.15	IPR004827	GO:0003700;GO:0006355
PECH_002648		Fungal Zn(2)-Cys(6) binuclear cluster domain-containing protein	PF00172.18	IPR001138;IPR036864	GO:0000981;GO:0005634;GO:0006355;GO:0008270
PECH_002650		Nitrogen regulatory protein areA	PF00320.27;PF08550.10;PF07573.11	IPR000679;IPR011420;IPR013088;IPR013860;IPR039355	GO:0003677;GO:0003700;GO:0005634;GO:0006355;GO:0008270;GO:0042128;GO:0043565
PECH_002665		Transcription factor of morphogenesis Mcm1-like protein	PF00319.18	IPR002100;IPR033897;IPR036879	GO:0000982;GO:0000987;GO:0003677;GO:0045944;GO:0046983
PECH_002686		Uncharacterized protein	PF05856.12;PF00076.22	IPR000504;IPR008384;IPR012677;IPR034666;IPR035979	GO:0003676;GO:0005885;GO:0015629;GO:0030041;GO:0030833;GO:0034314
PECH_002691		Fungal Zn(2)-Cys(6) binuclear cluster domain-containing protein	PF00172.18	IPR001138;IPR036864	GO:0000981;GO:0005634;GO:0006355;GO:0008270
PECH_002747		Conidiophore development regulator abaA-like protein	PF01285.18	IPR000818;IPR038096	GO:0003700;GO:0006355
PECH_002748		Uncharacterized protein	PF00076.22	IPR000504;IPR012677;IPR034482;IPR035979	GO:0003676
PECH_002755		HTH Psq-type DNA-binding domain-containing protein	PF03221.16;PF04218.13	IPR006600;IPR007889;IPR009057	GO:0003677
PECH_002762		Fungal Zn(2)-Cys(6) binuclear cluster domain-containing protein		IPR001138;IPR036864	GO:0006355;GO:0000981;GO:0008270;GO:0005634
PECH_002764		Fungal Zn(2)-Cys(6) binuclear cluster domain-containing protein	PF00172.18;PF04082.18	IPR001138;IPR007219;IPR036864	GO:0000981;GO:0003677;GO:0005634;GO:0006351;GO:0006355;GO:0008270
PECH_002765		Fungal Zn(2)-Cys(6) binuclear cluster domain-containing protein	PF00172.18;PF04082.18	IPR001138;IPR007219;IPR036864	GO:0006355;GO:0006351;GO:0008270;GO:0000981;GO:0003677;GO:0005634
PECH_002781		Fungal Zn(2)-Cys(6) binuclear cluster domain-containing protein	PF04082.18;PF00172.18	IPR001138;IPR007219;IPR036864	GO:0000981;GO:0003677;GO:0005634;GO:0006351;GO:0006355;GO:0008270
PECH_002843		GATA transcription factor SREP	PF00320.27	IPR000679;IPR013088;IPR039355	GO:0003700;GO:0006355;GO:0008270;GO:0043565
PECH_002880		Fungal Zn(2)-Cys(6) binuclear cluster domain-containing protein	PF04082.18;PF00172.18	IPR001138;IPR007219;IPR036864	GO:0000981;GO:0003677;GO:0005634;GO:0006351;GO:0006355;GO:0008270
PECH_002981		Transcription factor TFIIIB component B	PF15963.5	IPR001005;IPR009057;IPR017174;IPR030701	GO:0000126;GO:0000995;GO:0003677;GO:0006383
PECH_002990		Transcription activator of gluconeogenesis acuK		IPR001138;IPR036864	GO:0000981;GO:0005634;GO:0006355;GO:0008270
PECH_003004		Fungal Zn(2)-Cys(6) binuclear cluster domain-containing protein	PF00172.18;PF11951.8	IPR021858;IPR001138;IPR036864	GO:0006355;GO:0008270;GO:0000981;GO:0005634
PECH_003006		Homeobox transcription factor RfeB-like protein	PF00046.29	IPR001356;IPR009057;IPR017970	GO:0003677;GO:0006355;GO:0043565
PECH_003018		Fungal Zn(2)-Cys(6) binuclear cluster domain-containing protein	PF00172.18;PF04082.18	IPR001138;IPR007219;IPR036864	GO:0000981;GO:0003677;GO:0005634;GO:0006351;GO:0006355;GO:0008270
PECH_003024		Fungal Zn(2)-Cys(6) binuclear cluster domain-containing protein	PF00172.18	IPR001138;IPR036864	GO:0000981;GO:0005634;GO:0006355;GO:0008270
PECH_003076		Fungal Zn(2)-Cys(6) binuclear cluster domain-containing protein	PF00172.18;PF11951.8	IPR021858;IPR001138;IPR036864	GO:0006355;GO:0000981;GO:0008270;GO:0005634
PECH_003083		Thiamine repressible genes regulatory protein	PF04082.18;PF00172.18	IPR001138;IPR007219;IPR036864	GO:0000981;GO:0003677;GO:0005634;GO:0006351;GO:0006355;GO:0008270
PECH_003120		Stress response element-binding protein	PF00096.26	IPR013087;IPR036236	GO:0003676
PECH_003142		Uncharacterized protein	PF00076.22;PF01585.23;PF00641.18	IPR000467;IPR000504;IPR001876;IPR012677;IPR035979;IPR036443	GO:0003676
PECH_003148		Fungal Zn(2)-Cys(6) binuclear cluster domain-containing protein	PF04082.18;PF00172.18	IPR001138;IPR007219;IPR036864	GO:0000981;GO:0003677;GO:0005634;GO:0006351;GO:0006355;GO:0008270
PECH_003153		Fungal Zn(2)-Cys(6) binuclear cluster domain-containing protein	PF04082.18;PF00172.18	IPR001138;IPR007219;IPR036864	GO:0000981;GO:0003677;GO:0005634;GO:0006351;GO:0006355;GO:0008270
PECH_003189		Transcription regulator BglR-like protein		IPR013087;IPR036236	GO:0003676
PECH_003203		Uncharacterized protein	PF18044.1	IPR000571;IPR036855	GO:0046872
PECH_003216		Fungal Zn(2)-Cys(6) binuclear cluster domain-containing protein	PF04082.18;PF00172.18	IPR001138;IPR007219;IPR036864	GO:0000981;GO:0003677;GO:0005634;GO:0006351;GO:0006355;GO:0008270
PECH_003221		Regulatory protein LEU3-like protein	PF04082.18;PF00172.18	IPR001138;IPR007219;IPR036864	GO:0000981;GO:0003677;GO:0005634;GO:0006351;GO:0006355;GO:0008270
PECH_003255		Fungal Zn(2)-Cys(6) binuclear cluster domain-containing protein		IPR001138	GO:0000981;GO:0005634;GO:0006355;GO:0008270
PECH_003270		Uncharacterized protein	PF04818.13;PF00076.22	IPR000504;IPR006569;IPR006903;IPR008942;IPR012677;IPR035979	GO:0003676
PECH_003318		Fungal Zn(2)-Cys(6) binuclear cluster domain-containing protein	PF00172.18	IPR001138;IPR036864	GO:0000981;GO:0005634;GO:0006355;GO:0008270
PECH_003338		Uncharacterized protein	PF02136.20;PF00076.22	IPR000504;IPR002075;IPR012677;IPR018222;IPR032710;IPR035979	GO:0003676
PECH_003423		Fungal Zn(2)-Cys(6) binuclear cluster domain-containing protein	PF04082.18;PF00172.18	IPR001138;IPR007219;IPR036864	GO:0000981;GO:0003677;GO:0005634;GO:0006351;GO:0006355;GO:0008270
PECH_003425		Fungal Zn(2)-Cys(6) binuclear cluster and zinc finger C2H2-type domain-containing protein	PF04082.18;PF00172.18	IPR001138;IPR007219;IPR013087;IPR036236;IPR036864	GO:0000981;GO:0003676;GO:0003677;GO:0005634;GO:0006351;GO:0006355;GO:0008270
PECH_003429		Nitrogen assimilation transcription factor nirA	PF00172.18;PF04082.18	IPR007219;IPR001138;IPR036864	GO:0006355;GO:0006351;GO:0000981;GO:0008270;GO:0003677;GO:0005634
PECH_003439		U1 small nuclear ribonucleoprotein A/U2 small nuclear ribonucleoprotein B' domain-containing protein	PF00076.22	IPR000504;IPR012677;IPR035979	GO:0003676
PECH_003472		Zinc finger C2H2 type domain-containing protein	PF04082.18;PF00096.26	IPR007219;IPR013087;IPR036236	GO:0003676;GO:0003677;GO:0005634;GO:0006351;GO:0008270
PECH_003500		Zinc finger C2H2 type domain-containing protein		IPR013087;IPR039258	GO:0003676
PECH_003501		Zinc finger C2H2 type domain-containing protein	PF00096.26;PF04082.18	IPR007219;IPR013087;IPR036236	GO:0003676;GO:0003677;GO:0005634;GO:0006351;GO:0008270
PECH_003515		Fungal Zn(2)-Cys(6) binuclear cluster domain-containing protein	PF00172.18;PF04082.18	IPR001138;IPR007219;IPR036864	GO:0000981;GO:0003677;GO:0005634;GO:0006351;GO:0006355;GO:0008270
PECH_003522		Fungal Zn(2)-Cys(6) binuclear cluster domain-containing protein		IPR001138;IPR036864	GO:0006355;GO:0000981;GO:0008270;GO:0005634
PECH_003575		BZIP transcription factor		IPR004827	GO:0003700;GO:0006355
PECH_003578		Uncharacterized protein		IPR000504;IPR012677;IPR035979	GO:0003676
PECH_003589		Basic-region helix-loop-helix (bHLH) transcription factor	PF00010.26	IPR011598;IPR036638	GO:0046983
PECH_003612		DNA damage and replication checkpoint protein rfx1-like protein	PF02257.15	IPR003150;IPR036388;IPR036390	GO:0003677;GO:0006355
PECH_003614		Early growth response protein 1	PF00096.26;PF00172.18;PF04082.18	IPR001138;IPR007219;IPR013087;IPR036864;IPR036236	GO:0006355;GO:0006351;GO:0000981;GO:0008270;GO:0003677;GO:0003676;GO:0005634
PECH_003625		Zinc finger C2H2 type domain-containing protein	PF00096.26	IPR013087;IPR036236	GO:0003676
PECH_003662		U1 small nuclear ribonucleoprotein	PF12220.8;PF00076.22	IPR000504;IPR012677;IPR022023;IPR034143;IPR035979	GO:0003676;GO:0030619
PECH_003672		Fungal Zn(2)-Cys(6) binuclear cluster domain-containing protein	PF00172.18;PF04082.18	IPR001138;IPR007219;IPR036864	GO:0000981;GO:0003677;GO:0005634;GO:0006351;GO:0006355;GO:0008270
PECH_003677		Fungal Zn(2)-Cys(6) binuclear cluster domain-containing protein	PF00172.18	IPR001138;IPR036864	GO:0000981;GO:0005634;GO:0006355;GO:0008270
PECH_003714		Fungal Zn(2)-Cys(6) binuclear cluster domain-containing protein	PF11951.8;PF00172.18	IPR001138;IPR021858;IPR036864	GO:0000981;GO:0005634;GO:0006355;GO:0008270
PECH_003727		Transcription factor atf21-like protein	PF00170.21	IPR002112;IPR004827	GO:0003677;GO:0003700;GO:0006355
PECH_003737		Fungal Zn(2)-Cys(6) binuclear cluster domain-containing protein	PF00172.18	IPR001138;IPR036864	GO:0000981;GO:0005634;GO:0006355;GO:0008270
PECH_003743		Fungal Zn(2)-Cys(6) binuclear cluster domain-containing protein	PF00172.18	IPR001138;IPR036864	GO:0000981;GO:0005634;GO:0006355;GO:0008270
PECH_003783		Forkhead transcription factor	PF00250.18;PF00498.26	IPR000253;IPR001766;IPR008984;IPR036388;IPR036390	GO:0003700;GO:0005515;GO:0006355;GO:0043565
PECH_003830		Pre-mRNA-splicing factor cwc24	PF00642.24;PF13920.6	IPR000571;IPR001841;IPR013083;IPR017907;IPR036855	GO:0046872
PECH_003888		RNA recognition motif-containing protein	PF00076.22	IPR000504;IPR012677;IPR035979	GO:0003676
PECH_003915		Adhesion and hyphal regulator	PF11951.8	IPR001138;IPR021858;IPR036864	GO:0000981;GO:0005634;GO:0006355;GO:0008270
PECH_003981		U4/U6.U5 small nuclear ribonucleoprotein component snu23	PF12171.8	IPR003604;IPR013087;IPR022755;IPR036236	GO:0003676;GO:0008270
PECH_004003		Fungal Zn(2)-Cys(6) binuclear cluster domain-containing protein		IPR001138	GO:0000981;GO:0005634;GO:0006355;GO:0008270
PECH_004005		Poly(A)-specific ribonuclease subunit	PF18101.1	IPR000571;IPR000719;IPR011009;IPR030844	GO:0000289;GO:0003723;GO:0004672;GO:0005524;GO:0006397;GO:0006468;GO:0031251;GO:0046872
PECH_004012		Fungal Zn(2)-Cys(6) binuclear cluster domain-containing protein	PF04082.18;PF00172.18	IPR001138;IPR007219;IPR036864	GO:0000981;GO:0003677;GO:0005634;GO:0006351;GO:0006355;GO:0008270
PECH_004028		Fungal Zn(2)-Cys(6) binuclear cluster domain-containing protein	PF11951.8;PF00172.18	IPR001138;IPR021858;IPR036864	GO:0000981;GO:0005634;GO:0006355;GO:0008270
PECH_004058		Basic-region helix-loop-helix (bHLH) transcription factor	PF00010.26	IPR011598;IPR036638	GO:0046983
PECH_004062		Fungal Zn(2)-Cys(6) binuclear cluster domain-containing protein	PF00172.18	IPR001138;IPR036864	GO:0000981;GO:0005634;GO:0006355;GO:0008270
PECH_004071		Uncharacterized protein	PF00076.22	IPR000504;IPR012677;IPR035979	GO:0003676
PECH_004077		Fungal Zn(2)-Cys(6) binuclear cluster domain-containing protein	PF00172.18	IPR001138;IPR036864	GO:0006355;GO:0008270;GO:0000981;GO:0005634
PECH_004104		Conidiation transcription factor FlbC-like protein	PF00096.26;PF12874.7	IPR013087;IPR036236	GO:0003676
PECH_004109		PWI domain-containing protein	PF01480.17	IPR000504;IPR002483;IPR034268;IPR035979;IPR036483	GO:0003676;GO:0006397
PECH_004123		Cellulolytic and xylanolytic regulator CxrB-like protein	PF00096.26	IPR013087;IPR036236	GO:0003676
PECH_004125		Fungal Zn(2)-Cys(6) binuclear cluster domain-containing protein	PF00172.18	IPR001138;IPR036864	GO:0000981;GO:0005634;GO:0006355;GO:0008270
PECH_004129		Fungal Zn(2)-Cys(6) binuclear cluster domain-containing protein	PF00172.18	IPR001138;IPR036864	GO:0000981;GO:0005634;GO:0006355;GO:0008270
PECH_004137		Nitrogen assimilation transcription factor	PF04082.18;PF00172.18	IPR001138;IPR007219;IPR036864	GO:0000981;GO:0003677;GO:0005634;GO:0006351;GO:0006355;GO:0008270
PECH_004149		Fungal Zn(2)-Cys(6) binuclear cluster domain-containing protein	PF00172.18	IPR001138;IPR036864	GO:0000981;GO:0005634;GO:0006355;GO:0008270
PECH_004155		Uncharacterized protein	PF05495.12	IPR000571;IPR008913;IPR037274	GO:0008270;GO:0046872
PECH_004185		Copper resistance protein CRF1-like protein	PF00649.18	IPR001083;IPR036395	GO:0003677;GO:0003700;GO:0005507;GO:0005634;GO:0006355
PECH_004186		Glucose transport transcription regulator	PF00172.18	IPR001138;IPR036864	GO:0000981;GO:0005634;GO:0006355;GO:0008270
PECH_004188		Chromatin structure-remodeling complex subunit RSC9		IPR003150	GO:0003677;GO:0006355
PECH_004194		Fungal Zn(2)-Cys(6) binuclear cluster domain-containing protein	PF04082.18;PF00172.18	IPR001138;IPR007219;IPR036864	GO:0000981;GO:0003677;GO:0005634;GO:0006351;GO:0006355;GO:0008270
PECH_004195		Uncharacterized protein	PF00076.22	IPR000504;IPR012677;IPR034215;IPR035979	GO:0003676
PECH_004201		Zinc finger C2H2 type domain-containing protein	PF11917.8	IPR013087;IPR021842	GO:0003676
PECH_004221		Uncharacterized protein	PF00076.22	IPR000504;IPR012677;IPR034393;IPR035979	GO:0003676
PECH_004225		Fungal Zn(2)-Cys(6) binuclear cluster domain-containing protein	PF04082.18;PF00172.18	IPR001138;IPR007219;IPR036864	GO:0000981;GO:0003677;GO:0005634;GO:0006351;GO:0006355;GO:0008270
PECH_004241		Fungal Zn(2)-Cys(6) binuclear cluster domain-containing protein	PF04082.18;PF00172.18;PF03902.13	IPR001138;IPR005600;IPR007219;IPR036864	GO:0000981;GO:0003677;GO:0005634;GO:0006351;GO:0006355;GO:0008270
PECH_004254		Telomere-associated protein 1	PF13921.6;PF00249.31	IPR001005;IPR009057;IPR017930	GO:0003677
PECH_004284		Fungal Zn(2)-Cys(6) binuclear cluster domain-containing protein	PF00172.18	IPR001138;IPR036864	GO:0006355;GO:0008270;GO:0000981;GO:0005634
PECH_004288		Myb-like DNA-binding domain-containing protein		IPR001005;IPR009057	GO:0003677
PECH_004292		Fungal Zn(2)-Cys(6) binuclear cluster domain-containing protein	PF00172.18	IPR001138;IPR036864	GO:0006355;GO:0008270;GO:0000981;GO:0005634
PECH_004312		CCAAT-binding transcription factor HAP2	PF02045.15	IPR001289	GO:0003700;GO:0006355
PECH_004314		Arsenite resistance protein ARS2 family protein	PF12066.8;PF13821.6;PF04959.13	IPR007042;IPR013087;IPR021933;IPR025239;IPR039249	GO:0003676
PECH_004337		Zinc finger C2H2 type domain-containing protein	PF00096.26	IPR013087;IPR036236	GO:0003676
PECH_004346		Vacuolar segregation protein	PF01363.21;PF11464.8	IPR000306;IPR006642;IPR011011;IPR013083;IPR013087;IPR017455;IPR021565;IPR036531	GO:0003676;GO:0003677;GO:0006281;GO:0046872
PECH_004377		Fungal Zn(2)-Cys(6) binuclear cluster domain-containing protein	PF00172.18	IPR001138;IPR036864	GO:0000981;GO:0005634;GO:0006355;GO:0008270
PECH_004390		Zinc finger C3H1-type domain-containing protein	PF18044.1;PF13087.6;PF13086.6	IPR000967;IPR041677;IPR041367;IPR041679;IPR000571;IPR027417	GO:0006355;GO:0003700;GO:0008270;GO:0046872;GO:0005634
PECH_004416		Basic-region helix-loop-helix (bHLH) transcription factor esc1-like protein	PF00010.26	IPR011598;IPR036638	GO:0046983
PECH_004422		Fungal Zn(2)-Cys(6) binuclear cluster domain-containing protein	PF04082.18;PF00172.18	IPR001138;IPR007219;IPR036864	GO:0000981;GO:0003677;GO:0005634;GO:0006351;GO:0006355;GO:0008270
PECH_004429		Acetamidase regulatory protein	PF04082.18;PF00172.18	IPR001138;IPR007219;IPR036864	GO:0000981;GO:0003677;GO:0005634;GO:0006351;GO:0006355;GO:0008270
PECH_004446		Lid2 complex component snt2-like protein	PF13832.6;PF01426.18;PF13831.6;PF00249.31	IPR000949;IPR001005;IPR001025;IPR001965;IPR009057;IPR011011;IPR013083;IPR017884;IPR019786;IPR019787;IPR029617;IPR034732	GO:0003677;GO:0003682
PECH_004448		Fungal Zn(2)-Cys(6) binuclear cluster domain-containing protein		IPR001138;IPR036864	GO:0006355;GO:0008270;GO:0000981;GO:0005634
PECH_004453		Stress response regulator	PF00447.17;PF00072.24	IPR000232;IPR001789;IPR011006;IPR014402;IPR027725;IPR036388;IPR036390	GO:0000156;GO:0000160;GO:0003700;GO:0005634;GO:0006355;GO:0006950;GO:0043565
PECH_004470		Fungal Zn(2)-Cys(6) binuclear cluster domain-containing protein	PF00172.18;PF04082.18	IPR001138;IPR007219;IPR036864	GO:0006355;GO:0006351;GO:0000981;GO:0008270;GO:0003677;GO:0005634
PECH_004473		Fungal Zn(2)-Cys(6) binuclear cluster domain-containing protein	PF00172.18;PF11951.8	IPR001138;IPR021858;IPR036864	GO:0000981;GO:0005634;GO:0006355;GO:0008270
PECH_004482		Quinic acid utilization activator	PF04082.18;PF00172.18	IPR000626;IPR001138;IPR007219;IPR036864	GO:0000981;GO:0003677;GO:0005515;GO:0005634;GO:0006351;GO:0006355;GO:0008270
PECH_004510		Fungal Zn(2)-Cys(6) binuclear cluster domain-containing protein	PF00172.18;PF11951.8	IPR021858;IPR001138;IPR036864	GO:0006355;GO:0000981;GO:0008270;GO:0005634
PECH_004525		Zinc finger C2H2 type domain-containing protein		IPR013087;IPR036236	GO:0003676
PECH_004534		Transcriptional adapter 2	PF00249.31;PF04433.17;PF00569.17	IPR000433;IPR001005;IPR007526;IPR009057;IPR016827;IPR017884	GO:0003677;GO:0003713;GO:0005515;GO:0006357;GO:0008270;GO:0035065
PECH_004544		Phosphorus acquisition-controlling protein	PF00010.26	IPR011598;IPR036638	GO:0046983
PECH_004563		Carbon catabolite repressor CreA-like protein	PF00096.26	IPR013087;IPR036236	GO:0003676
PECH_004601		Fungal Zn(2)-Cys(6) binuclear cluster domain-containing protein	PF11951.8;PF00172.18	IPR001138;IPR021858;IPR036864	GO:0000981;GO:0005634;GO:0006355;GO:0008270
PECH_004603		Fungal Zn(2)-Cys(6) binuclear cluster domain-containing protein	PF00172.18;PF04082.18	IPR007219;IPR001138;IPR036864	GO:0006355;GO:0006351;GO:0000981;GO:0008270;GO:0003677;GO:0005634
PECH_004645		Flocculation suppression protein SFL1-like protein	PF00447.17	IPR000232;IPR027725;IPR036388;IPR036390	GO:0003700;GO:0005634;GO:0006355;GO:0043565
PECH_004651		Zinc finger C2H2 type domain-containing protein	PF00096.26	IPR013087;IPR029796;IPR036236	GO:0003676
PECH_004670		Fungal Zn(2)-Cys(6) binuclear cluster domain-containing protein	PF00172.18;PF04082.18	IPR007219;IPR001138;IPR036864	GO:0006355;GO:0006351;GO:0000981;GO:0008270;GO:0003677;GO:0005634
PECH_004681		Fungal Zn(2)-Cys(6) binuclear cluster domain-containing protein		IPR001138;IPR036864	GO:0000981;GO:0005634;GO:0006355;GO:0008270
PECH_004724		Zinc finger C2H2 type domain-containing protein	PF04082.18;PF00096.26	IPR007219;IPR013087;IPR036236	GO:0003676;GO:0003677;GO:0005634;GO:0006351;GO:0008270
PECH_004726		Uncharacterized protein	PF01480.17;PF00076.22	IPR000504;IPR000571;IPR002483;IPR012677;IPR035979;IPR036483	GO:0003676;GO:0006397;GO:0046872
PECH_004747		Ascus development protein AreB-like protein	PF00320.27	IPR000679;IPR013088;IPR039355	GO:0003700;GO:0006355;GO:0008270;GO:0043565
PECH_004786		Fungal Zn(2)-Cys(6) binuclear cluster domain-containing protein	PF04082.18;PF00172.18	IPR001138;IPR007219;IPR036864	GO:0000981;GO:0003677;GO:0005634;GO:0006351;GO:0006355;GO:0008270
PECH_004833		Uncharacterized protein	PF10443.9;PF00076.22	IPR000504;IPR012677;IPR018850;IPR034260;IPR035979	GO:0003676
PECH_004848		Fungal Zn(2)-Cys(6) binuclear cluster domain-containing protein	PF00172.18;PF04082.18	IPR007219;IPR001138;IPR036864	GO:0006355;GO:0006351;GO:0000981;GO:0008270;GO:0003677;GO:0005634
PECH_004864		INO80 complex subunit 1		IPR013087;IPR036236	GO:0003676
PECH_004883		Fungal Zn(2)-Cys(6) binuclear cluster domain-containing protein	PF04082.18;PF00172.18	IPR001138;IPR007219;IPR036864	GO:0000981;GO:0003677;GO:0005634;GO:0006351;GO:0006355;GO:0008270
PECH_004885		Fungal Zn(2)-Cys(6) binuclear cluster domain-containing protein	PF00172.18	IPR001138;IPR036864	GO:0000981;GO:0005634;GO:0006355;GO:0008270
PECH_004894		Fungal Zn(2)-Cys(6) binuclear cluster domain-containing protein		IPR001138	GO:0000981;GO:0005634;GO:0006355;GO:0008270
PECH_004905		Homeobox transcription factor	PF00046.29	IPR001356;IPR009057;IPR017970	GO:0003677;GO:0006355;GO:0043565
PECH_004935		Fungal Zn(2)-Cys(6) binuclear cluster domain-containing protein	PF11951.8;PF00172.18	IPR001138;IPR021858;IPR036864	GO:0000981;GO:0005634;GO:0006355;GO:0008270
PECH_004938		Fungal Zn(2)-Cys(6) binuclear cluster domain-containing protein	PF04082.18;PF00172.18	IPR001138;IPR007219;IPR036864	GO:0000981;GO:0003677;GO:0005634;GO:0006351;GO:0006355;GO:0008270
PECH_004942		AP-1-like transcription factor	PF08601.10;PF00170.21	IPR004827;IPR013910;IPR023167	GO:0003700;GO:0006355
PECH_004983		Fungal Zn(2)-Cys(6) binuclear cluster domain-containing protein	PF00172.18	IPR001138;IPR036864	GO:0000981;GO:0005634;GO:0006355;GO:0008270
PECH_004985		Basic-region helix-loop-helix (bHLH) transcription factor	PF00010.26	IPR011598;IPR036638	GO:0046983
PECH_005007		Transcriptional regulator Crz1-like protein	PF00096.26	IPR013087;IPR036236	GO:0003676
PECH_005051		Fungal Zn(2)-Cys(6) binuclear cluster domain-containing protein	PF00172.18	IPR001138;IPR036864	GO:0000981;GO:0005634;GO:0006355;GO:0008270
PECH_005059		Fungal Zn(2)-Cys(6) binuclear cluster domain-containing protein	PF00172.18;PF04082.18	IPR007219;IPR001138;IPR036864	GO:0006355;GO:0006351;GO:0000981;GO:0008270;GO:0003677;GO:0005634
PECH_005068		Fungal Zn(2)-Cys(6) binuclear cluster domain-containing protein	PF00172.18;PF04082.18	IPR007219;IPR001138;IPR036864	GO:0006355;GO:0006351;GO:0000981;GO:0008270;GO:0003677;GO:0005634
PECH_005069		Fungal Zn(2)-Cys(6) binuclear cluster domain-containing protein	PF11951.8	IPR001138;IPR021858;IPR036864	GO:0000981;GO:0005634;GO:0006355;GO:0008270
PECH_005090		Fungal Zn(2)-Cys(6) binuclear cluster domain-containing protein		IPR001138;IPR036864	GO:0006355;GO:0000981;GO:0008270;GO:0005634
PECH_005097		Eukaryotic translation initiation factor 3 subunit G	PF12353.8;PF00076.22	IPR000504;IPR012677;IPR017334;IPR024675;IPR034240;IPR035979	GO:0003676;GO:0003743;GO:0005737;GO:0005852
PECH_005099		NDT80 / PhoG like DNA-binding family protein	PF05224.12	IPR008967;IPR024061;IPR037141	GO:0003677;GO:0003700;GO:0006355
PECH_005108		Uncharacterized protein	PF00076.22	IPR000504;IPR012677;IPR035979	GO:0003676
PECH_005204		Fungal Zn(2)-Cys(6) binuclear cluster domain-containing protein	PF04082.18;PF00172.18	IPR001138;IPR007219;IPR036864	GO:0000981;GO:0003677;GO:0005634;GO:0006351;GO:0006355;GO:0008270
PECH_005206		Zinc finger C2H2 type domain-containing protein		IPR013087;IPR036236	GO:0003676
PECH_005232		Fungal Zn(2)-Cys(6) binuclear cluster domain-containing protein	PF04082.18;PF00172.18	IPR001138;IPR007219;IPR036864	GO:0000981;GO:0003677;GO:0005634;GO:0006351;GO:0006355;GO:0008270
PECH_005261		Zinc finger C2H2 type domain-containing protein	PF12171.8;PF13912.6;PF12874.7	IPR013087;IPR022755;IPR036236	GO:0003676
PECH_005267		Cell pattern formation-associated stuA-like protein		IPR003163;IPR018004;IPR036887	GO:0003677
PECH_005293		Fungal Zn(2)-Cys(6) binuclear cluster domain-containing protein	PF04082.18;PF00172.18	IPR001138;IPR007219;IPR036864	GO:0000981;GO:0003677;GO:0005634;GO:0006351;GO:0006355;GO:0008270
PECH_005302		Fungal Zn(2)-Cys(6) binuclear cluster domain-containing protein	PF00172.18;PF04082.18	IPR001138;IPR007219;IPR036864	GO:0000981;GO:0003677;GO:0005634;GO:0006351;GO:0006355;GO:0008270
PECH_005336		Transcriptional activator hacA-like protein	PF07716.15	IPR004827	GO:0003700;GO:0006355
PECH_005362		Zinc finger C3H1-type domain-containing protein		IPR000571	GO:0046872
PECH_005367		ISWI chromatin-remodeling complex ATPase ISW2	PF00176.23;PF09111.10;PF09110.11;PF00271.31	IPR000330;IPR001005;IPR001650;IPR009057;IPR014001;IPR015194;IPR015195;IPR017884;IPR027417;IPR036306;IPR038718	GO:0003676;GO:0003677;GO:0005524;GO:0005634;GO:0006338;GO:0016818;GO:0031491;GO:0043044
PECH_005382		Krueppel-like factor 3	PF00096.26	IPR013087;IPR036236	GO:0003676
PECH_005397		Uncharacterized protein	PF00076.22	IPR000504;IPR012677;IPR035979	GO:0003676
PECH_005498		Sexual development transcription factor SteA-like protein	PF02200.16;PF00096.26	IPR003120;IPR013087;IPR036236	GO:0003676;GO:0003700;GO:0005634;GO:0006355
PECH_005506		Fungal Zn(2)-Cys(6) binuclear cluster domain-containing protein	PF00172.18;PF04082.18	IPR001138;IPR007219;IPR036864	GO:0000981;GO:0003677;GO:0005634;GO:0006351;GO:0006355;GO:0008270
PECH_005509		Pre-mRNA-splicing factor cwc2	PF16131.5;PF00076.22	IPR000504;IPR000571;IPR012677;IPR032297;IPR034181;IPR035979;IPR036855;IPR039171;IPR039173	GO:0000387;GO:0000398;GO:0003676;GO:0003723;GO:0017070;GO:0036002;GO:0045292;GO:0046872
PECH_005552		Proline utilization trans-activator	PF04082.18;PF00172.18	IPR001138;IPR007219;IPR036864	GO:0000981;GO:0003677;GO:0005634;GO:0006351;GO:0006355;GO:0008270
PECH_005570		Sterol uptake control protein 2	PF00172.18;PF11951.8	IPR001138;IPR021858;IPR036864	GO:0000981;GO:0005634;GO:0006355;GO:0008270
PECH_005632		Zinc finger NF-X1-type transcription factor	PF01424.22;PF01422.17	IPR000967;IPR001374;IPR019786;IPR034077;IPR034078;IPR036867	GO:0003676;GO:0003700;GO:0005634;GO:0006355;GO:0008270
PECH_005646		Fungal Zn(2)-Cys(6) binuclear cluster domain-containing protein	PF00172.18	IPR001138;IPR036864	GO:0006355;GO:0008270;GO:0000981;GO:0005634
PECH_005652		Zinc finger C2H2 type domain-containing protein		IPR013087;IPR036236	GO:0003676
PECH_005662		Positive regulator of purine utilization	PF00172.18;PF04082.18	IPR007219;IPR001138;IPR036864	GO:0006355;GO:0006351;GO:0000981;GO:0008270;GO:0003677;GO:0005634
PECH_005695		Transcriptional activator of proteases	PF04082.18;PF00172.18	IPR001138;IPR007219;IPR036864	GO:0000981;GO:0003677;GO:0005634;GO:0006351;GO:0006355;GO:0008270
PECH_005720		Cellulolytic transcriptional activator ClrB-like protein	PF04082.18;PF00172.18	IPR001138;IPR007219;IPR036864	GO:0000981;GO:0003677;GO:0005634;GO:0006351;GO:0006355;GO:0008270
PECH_005754		Fungal Zn(2)-Cys(6) binuclear cluster domain-containing protein	PF00172.18	IPR001138;IPR036864	GO:0000981;GO:0005634;GO:0006355;GO:0008270
PECH_005755		Fungal Zn(2)-Cys(6) binuclear cluster domain-containing protein	PF11951.8;PF00172.18	IPR001138;IPR021858;IPR036864	GO:0000981;GO:0005634;GO:0006355;GO:0008270
PECH_005785		Zinc finger C2H2 type domain-containing protein	PF04082.18;PF00096.26	IPR007219;IPR013087;IPR036236	GO:0003676;GO:0003677;GO:0005634;GO:0006351;GO:0008270
PECH_005789		Fungal Zn(2)-Cys(6) binuclear cluster domain-containing protein	PF00172.18;PF04082.18	IPR007219;IPR001138;IPR036864	GO:0006355;GO:0006351;GO:0000981;GO:0008270;GO:0003677;GO:0005634
PECH_005791		Polyadenylate-binding protein, cytoplasmic and nuclear	PF00076.22;PF00658.18	IPR000504;IPR002004;IPR006515;IPR012677;IPR035979;IPR036053	GO:0003676;GO:0003723
PECH_005832		HMG box transcriptional regulator	PF00505.19	IPR009071;IPR036910
PECH_005856		Uncharacterized protein	PF00076.22	IPR000504;IPR012677;IPR035979	GO:0003676
PECH_005900		Zinc finger C2H2 type domain-containing protein		IPR013087	GO:0003676
PECH_005905		Fungal Zn(2)-Cys(6) binuclear cluster domain-containing protein	PF04082.18;PF00172.18	IPR001138;IPR007219;IPR036864	GO:0000981;GO:0003677;GO:0005634;GO:0006351;GO:0006355;GO:0008270
PECH_005922		Fluconazole resistance protein 3	PF00170.21	IPR004827	GO:0003700;GO:0006355
PECH_005939		Myb-like DNA-binding domain-containing protein	PF13921.6	IPR001005;IPR009057;IPR017877;IPR017930	GO:0003677
PECH_005964		Bud site selection protein 20	PF12171.8	IPR003604;IPR013087;IPR022755;IPR036236	GO:0003676;GO:0008270
PECH_006016		Fungal Zn(2)-Cys(6) binuclear cluster domain-containing protein	PF00172.18;PF04082.18	IPR007219;IPR001138;IPR036864	GO:0006355;GO:0006351;GO:0000981;GO:0008270;GO:0003677;GO:0005634
PECH_006032		RNA-binding motif protein 8	PF00076.22	IPR000504;IPR008111;IPR012677;IPR033744;IPR035979	GO:0003676;GO:0003723;GO:0003729;GO:0005634;GO:0005737;GO:0006396
PECH_006035		Fungal Zn(2)-Cys(6) binuclear cluster domain-containing protein	PF00172.18	IPR001138;IPR036864	GO:0000981;GO:0005634;GO:0006355;GO:0008270
PECH_006042		Fungal Zn(2)-Cys(6) binuclear cluster domain-containing protein	PF00172.18	IPR001138;IPR036864	GO:0006355;GO:0000981;GO:0008270;GO:0005634
PECH_006052		Forkhead transcription factor	PF00250.18	IPR001766;IPR030456;IPR036388;IPR036390	GO:0003700;GO:0006355;GO:0043565
PECH_006055		Myb-like DNA-binding domain-containing protein	PF13921.6	IPR015495;IPR001005;IPR009057;IPR017877;IPR017930	GO:0003677
PECH_006060		Myb-like DNA-binding domain-containing protein	PF00249.31	IPR001005;IPR009057;IPR017877;IPR017930	GO:0003677
PECH_006079		Fungal Zn(2)-Cys(6) binuclear cluster domain-containing protein	PF00172.18;PF11951.8	IPR021858;IPR001138;IPR036864	GO:0006355;GO:0000981;GO:0008270;GO:0005634
PECH_006126		Splicing factor 3A subunit 3	PF11931.8;PF16837.5;PF12108.8;PF12171.8	IPR000690;IPR003604;IPR013087;IPR021966;IPR022755;IPR024598;IPR031774;IPR031776;IPR036236	GO:0000398;GO:0003676;GO:0003723;GO:0005634;GO:0005681;GO:0008270
PECH_006143		Exonuclease, RNase T/DNA polymerase III domain-containing protein	PF00641.18;PF00076.22;PF00929.24	IPR000504;IPR001876;IPR012337;IPR012677;IPR013520;IPR034351;IPR035979;IPR036397;IPR036443	GO:0003676
PECH_006166		RNA-binding post-transcriptional regulator	PF01424.22;PF00076.22	IPR000504;IPR001374;IPR012677;IPR034069;IPR034186;IPR035979;IPR036867	GO:0003676
PECH_006168		Heat shock factor protein 3	PF00447.17	IPR000232;IPR027725;IPR036388;IPR036390	GO:0003700;GO:0005634;GO:0006355;GO:0043565
PECH_006230		AT-hook transcription factor	PF01878.18;PF02178.19	IPR000116;IPR000637;IPR002740;IPR015947;IPR017956	GO:0000785;GO:0003677;GO:0005634;GO:0006355
PECH_006234		BZIP transcription factor		IPR004827	GO:0003700;GO:0006355
PECH_006248		Fungal Zn(2)-Cys(6) binuclear cluster domain-containing protein	PF00172.18	IPR001138;IPR036864	GO:0000981;GO:0005634;GO:0006355;GO:0008270
PECH_006257		Cellobiose response regulator ClbR-like protein	PF00172.18;PF04082.18	IPR001138;IPR007219;IPR036864	GO:0000981;GO:0003677;GO:0005634;GO:0006351;GO:0006355;GO:0008270
PECH_006280		Cleavage stimulation factor subunit 2	PF14327.6;PF00076.22;PF14304.6	IPR000504;IPR012677;IPR025742;IPR026896;IPR035979;IPR038192	GO:0003676;GO:0031124
PECH_006341		Fungal Zn(2)-Cys(6) binuclear cluster domain-containing protein	PF00172.18	IPR001138;IPR036864	GO:0000981;GO:0005634;GO:0006355;GO:0008270
PECH_006342		Fungal Zn(2)-Cys(6) binuclear cluster domain-containing protein	PF00172.18;PF11951.8	IPR001138;IPR021858;IPR036864	GO:0000981;GO:0005634;GO:0006355;GO:0008270
PECH_006343		Homeobox transcription factor	PF00046.29	IPR001356;IPR009057	GO:0003677
PECH_006359		Nutrient and stress factor 1	PF00096.26	IPR013087;IPR036236	GO:0003676
PECH_006368		Fungal Zn(2)-Cys(6) binuclear cluster domain-containing protein	PF11951.8;PF00172.18	IPR001138;IPR021858;IPR036864	GO:0000981;GO:0005634;GO:0006355;GO:0008270
PECH_006377		HMG box transcriptional regulator HmbB-like protein	PF00505.19	IPR009071;IPR036910
PECH_006382		Zinc-responsive transcriptional regulator	PF00096.26	IPR013087;IPR036236	GO:0003676
PECH_006414		Basic-region helix-loop-helix (bHLH) transcription factor	PF00010.26	IPR011598;IPR036638	GO:0046983
PECH_006421		BZIP transcription factor MetR-like protein	PF07716.15	IPR004827	GO:0003700;GO:0006355
PECH_006428		D-galacturonic acid-responsive regulator GaaR-like protein	PF04082.18;PF00172.18	IPR001138;IPR007219;IPR036864	GO:0000981;GO:0003677;GO:0005634;GO:0006351;GO:0006355;GO:0008270
PECH_006462		Fungal Zn(2)-Cys(6) binuclear cluster domain-containing protein	PF00172.18;PF04082.18	IPR001138;IPR007219;IPR036864	GO:0000981;GO:0003677;GO:0005634;GO:0006351;GO:0006355;GO:0008270
PECH_006484		Fungal Zn(2)-Cys(6) binuclear cluster domain-containing protein	PF00172.18;PF04082.18	IPR007219;IPR001138;IPR036864	GO:0006355;GO:0006351;GO:0000981;GO:0008270;GO:0003677;GO:0005634
PECH_006490		Zinc finger C2H2 type domain-containing protein		IPR013087;IPR036236	GO:0003676
PECH_006503		Transcription factor TBF1-like protein	PF08558.10	IPR001005;IPR009057;IPR013867;IPR017930	GO:0003677;GO:0042162;GO:0042803
PECH_006512		HTH APSES-type domain-containing protein		IPR003163;IPR018004;IPR036887;IPR037548	GO:0003677;GO:0070197;GO:1990862
PECH_006522		Fungal Zn(2)-Cys(6) binuclear cluster domain-containing protein	PF04082.18;PF00172.18	IPR001138;IPR007219;IPR036864	GO:0000981;GO:0003677;GO:0005634;GO:0006351;GO:0006355;GO:0008270
PECH_006531		Fungal Zn(2)-Cys(6) binuclear cluster domain-containing protein	PF00172.18;PF11951.8	IPR021858;IPR001138;IPR036864	GO:0006355;GO:0008270;GO:0000981;GO:0005634
PECH_006535		Basic-region helix-loop-helix (bHLH) transcription factor	PF00010.26	IPR011598;IPR032647;IPR036638	GO:0006355;GO:0008134;GO:0046983
PECH_006544		Positive regulator of purine utilization	PF00172.18;PF04082.18	IPR007219;IPR001138;IPR036864	GO:0006355;GO:0006351;GO:0000981;GO:0008270;GO:0003677;GO:0005634
PECH_006561		Homeobox and zinc finger C2H2 transcription factor	PF05920.11	IPR001356;IPR008422;IPR009057;IPR013087	GO:0003676;GO:0003677;GO:0006355
PECH_006564		Nitrogen assimilation transcription factor	PF04082.18	IPR001138;IPR007219	GO:0000981;GO:0003677;GO:0005634;GO:0006351;GO:0006355;GO:0008270
PECH_006570		Fungal Zn(2)-Cys(6) binuclear cluster domain-containing protein	PF00172.18	IPR001138;IPR036864	GO:0006355;GO:0008270;GO:0000981;GO:0005634
PECH_006579		Uncharacterized protein	PF03467.15;PF00076.22	IPR000504;IPR005120;IPR012677;IPR035979	GO:0003676
PECH_006615		Fungal Zn(2)-Cys(6) binuclear cluster domain-containing protein	PF00172.18;PF04082.18	IPR007219;IPR001138;IPR036864	GO:0006355;GO:0006351;GO:0000981;GO:0008270;GO:0003677;GO:0005634
PECH_006621		Respiration factor 2	PF04082.18;PF00096.26	IPR007219;IPR013087;IPR036236	GO:0003676;GO:0003677;GO:0005634;GO:0006351;GO:0008270
PECH_006634		Fungal Zn(2)-Cys(6) binuclear cluster domain-containing protein	PF00172.18	IPR001138;IPR036864	GO:0000981;GO:0005634;GO:0006355;GO:0008270
PECH_006651		RNA recognition motif-containing protein	PF00076.22	IPR000504;IPR003954;IPR012677;IPR034509;IPR034639;IPR035979	GO:0003676
PECH_006679		SWR1-complex protein 4	PF16282.5	IPR001005;IPR008468;IPR009057;IPR017877;IPR027109;IPR032563	GO:0003677;GO:0005634;GO:0006281;GO:0006338;GO:0035267;GO:0043967;GO:0043968;GO:0045892
PECH_006693		Fungal Zn(2)-Cys(6) binuclear cluster domain-containing protein	PF00172.18	IPR001138;IPR036864	GO:0006355;GO:0008270;GO:0000981;GO:0005634
PECH_006700		Chromatin modification-related eaf1-like protein	PF13921.6;PF07529.13	IPR001005;IPR009057;IPR014012;IPR017877	GO:0003677
PECH_006741		Uncharacterized protein		IPR000504;IPR012677;IPR034777;IPR035979	GO:0003676
PECH_006746		Uncharacterized protein	PF10453.9;PF18044.1	IPR000571;IPR019496;IPR036855;IPR039136	GO:0003723;GO:0046872
PECH_006754		Zinc finger C2H2 type domain-containing protein		IPR013087	GO:0003676
PECH_006756		Zinc finger C2H2 type domain-containing protein		IPR013087;IPR036236	GO:0003676
PECH_006766		U1 small nuclear ribonucleoprotein A/U2 small nuclear ribonucleoprotein B family protein	PF00076.22	IPR000504;IPR012677;IPR035979	GO:0003676
PECH_006791		Uncharacterized protein	PF04146.15;PF00076.22	IPR000504;IPR007275;IPR012677;IPR035979	GO:0003676;GO:0003723
PECH_006840		Fungal Zn(2)-Cys(6) binuclear cluster domain-containing protein	PF00172.18	IPR001138;IPR036864	GO:0000981;GO:0005634;GO:0006355;GO:0008270
PECH_006942		Fork-head transcriptional regulator 2	PF00250.18;PF00498.26	IPR000253;IPR001766;IPR008984;IPR018122;IPR030456;IPR036388;IPR036390	GO:0003700;GO:0005515;GO:0006355;GO:0043565
PECH_006943		pH-response transcription factor pacC-like protein	PF00096.26	IPR013087;IPR036236	GO:0003676
PECH_006945		Activator of stress genes 1	PF00172.18;PF04082.18	IPR007219;IPR001138;IPR036864	GO:0006355;GO:0006351;GO:0000981;GO:0008270;GO:0003677;GO:0005634
PECH_006963		Fungal Zn(2)-Cys(6) binuclear cluster domain-containing protein	PF00172.18;PF11951.8	IPR001138;IPR021858;IPR036864	GO:0000981;GO:0005634;GO:0006355;GO:0008270
PECH_006987		Regulatory protein cys-3	PF07716.15	IPR004827	GO:0003700;GO:0006355
PECH_007010		BZIP transcription factor		IPR004827	GO:0003700;GO:0006355
PECH_007011		Fungal Zn(2)-Cys(6) binuclear cluster domain-containing protein	PF04082.18;PF00172.18	IPR007219;IPR001138;IPR036864	GO:0006351;GO:0006355;GO:0003677;GO:0008270;GO:0000981;GO:0005634
PECH_007032		Fungal Zn(2)-Cys(6) binuclear cluster domain-containing protein	PF00172.18;PF04082.18	IPR007219;IPR001138;IPR036864	GO:0006355;GO:0006351;GO:0000981;GO:0008270;GO:0003677;GO:0005634
PECH_007045		Fungal Zn(2)-Cys(6) binuclear cluster domain-containing protein	PF16628.5;PF12464.8;PF14602.6;PF00172.18	IPR001138;IPR001451;IPR011004;IPR024688;IPR036864	GO:0000981;GO:0005634;GO:0006355;GO:0008270;GO:0016407
PECH_007109		Basic-region helix-loop-helix (bHLH) transcription factor	PF00010.26	IPR011598;IPR036638	GO:0046983
PECH_007124		Pre-mRNA-splicing factor	PF00076.22	IPR000504;IPR012677;IPR034356;IPR035979;IPR039171	GO:0000398;GO:0003676
PECH_007132		Fungal Zn(2)-Cys(6) binuclear cluster domain-containing protein	PF11951.8;PF00172.18	IPR001138;IPR021858;IPR036864	GO:0000981;GO:0005634;GO:0006355;GO:0008270
PECH_007139		Fungal Zn(2)-Cys(6) binuclear cluster domain-containing protein	PF00172.18;PF04082.18	IPR007219;IPR001138;IPR036864	GO:0006355;GO:0006351;GO:0000981;GO:0008270;GO:0003677;GO:0005634
PECH_007146		Fungal Zn(2)-Cys(6) binuclear cluster domain-containing protein	PF00172.18	IPR001138;IPR036864	GO:0006355;GO:0000981;GO:0008270;GO:0005634
PECH_007148		Acriflavine sensitivity control protein acr-2	PF00172.18;PF11951.8	IPR021858;IPR001138;IPR036864	GO:0006355;GO:0000981;GO:0008270;GO:0005634
PECH_007157		Fungal Zn(2)-Cys(6) binuclear cluster domain-containing protein	PF00172.18;PF04082.18	IPR001138;IPR007219;IPR036864	GO:0000981;GO:0003677;GO:0005634;GO:0006351;GO:0006355;GO:0008270
PECH_007190		Transcription factor kapC-like protein	PF00170.21	IPR004827	GO:0003700;GO:0006355
PECH_007197		Acetamidase regulatory protein	PF00172.18;PF04082.18	IPR001138;IPR007219;IPR036864	GO:0000981;GO:0003677;GO:0005634;GO:0006351;GO:0006355;GO:0008270
PECH_007202		mRNA 3'-end-processing protein	PF00642.24	IPR000571;IPR036855	GO:0046872
PECH_007290		Fungal Zn(2)-Cys(6) binuclear cluster domain-containing protein	PF00172.18	IPR001138;IPR036864	GO:0006355;GO:0000981;GO:0008270;GO:0005634
PECH_007340		Polyadenylate-binding protein	PF00076.22	IPR000504;IPR012677;IPR035979	GO:0003676
PECH_007349		Fungal Zn(2)-Cys(6) binuclear cluster domain-containing protein	PF04082.18;PF00172.18	IPR001138;IPR007219;IPR036864	GO:0000981;GO:0003677;GO:0005634;GO:0006351;GO:0006355;GO:0008270
PECH_007351		Zinc finger C2H2 type domain-containing protein		IPR013087	GO:0003676
PECH_007367		Fungal Zn(2)-Cys(6) binuclear cluster domain-containing protein	PF00172.18;PF04082.18	IPR007219;IPR001138;IPR036864	GO:0006355;GO:0006351;GO:0000981;GO:0008270;GO:0003677;GO:0005634
PECH_007383		Fungal Zn(2)-Cys(6) binuclear cluster domain-containing protein	PF11951.8;PF00172.18	IPR001138;IPR021858;IPR036864	GO:0000981;GO:0005634;GO:0006355;GO:0008270
PECH_007409		Fungal Zn(2)-Cys(6) binuclear cluster domain-containing protein	PF04082.18;PF00172.18	IPR001138;IPR007219;IPR036864	GO:0000981;GO:0003677;GO:0005634;GO:0006351;GO:0006355;GO:0008270
PECH_007435		C2H2 type master regulator of conidiophore development brlA-like protein	PF00096.26	IPR013087;IPR036236	GO:0003676
PECH_007439		Fungal Zn(2)-Cys(6) binuclear cluster domain-containing protein	PF04082.18;PF00172.18	IPR001138;IPR007219;IPR036864	GO:0000981;GO:0003677;GO:0005634;GO:0006351;GO:0006355;GO:0008270
PECH_007501		Uncharacterized protein	PF00076.22	IPR000504;IPR012677;IPR035979	GO:0003676
PECH_007511		Fungal Zn(2)-Cys(6) binuclear cluster domain-containing protein	PF00172.18;PF11951.8	IPR021858;IPR001138;IPR036864	GO:0006355;GO:0008270;GO:0000981;GO:0005634
PECH_007539		Mating-type protein MAT alpha 1 HMG-box-containing protein	PF04769.12	IPR006856	GO:0005634;GO:0007531;GO:0008301;GO:0045895
PECH_007545		Uncharacterized protein	PF00076.22	IPR000504;IPR012677;IPR035979	GO:0003676
PECH_007557		Uncharacterized protein	PF00076.22	IPR000504;IPR012677;IPR035979	GO:0003676
PECH_007626		DnaJ-like protein subfamily C member 21	PF00226.31;PF12171.8	IPR001623;IPR003604;IPR013087;IPR018253;IPR022755;IPR036236;IPR036869	GO:0003676;GO:0008270
PECH_007650		Ubiquitin thioesterase	PF02338.19	IPR003323;IPR013087;IPR038765;IPR039138	GO:0003676;GO:0004843;GO:0016579;GO:0030433;GO:1904265
PECH_007652		Spindle poison sensitivity protein	PF00642.24;PF18044.1	IPR000571;IPR036855	GO:0046872
PECH_007680		Fungal Zn(2)-Cys(6) binuclear cluster domain-containing protein	PF04082.18;PF00172.18	IPR001138;IPR007219;IPR036864	GO:0000981;GO:0003677;GO:0005634;GO:0006351;GO:0006355;GO:0008270
PECH_007681		Fungal Zn(2)-Cys(6) binuclear cluster domain-containing protein	PF00172.18;PF04082.18	IPR007219;IPR001138;IPR036864	GO:0006355;GO:0006351;GO:0000981;GO:0008270;GO:0003677;GO:0005634
PECH_007690		Fungal Zn(2)-Cys(6) binuclear cluster domain-containing protein	PF04082.18;PF00172.18	IPR001138;IPR007219;IPR036864	GO:0000981;GO:0003677;GO:0005634;GO:0006351;GO:0006355;GO:0008270
PECH_007705		AT-hook transcription factor	PF02178.19	IPR017956	GO:0003677
PECH_007706		Fungal Zn(2)-Cys(6) binuclear cluster domain-containing protein	PF04082.18;PF00172.18	IPR001138;IPR007219;IPR036864	GO:0000981;GO:0003677;GO:0005634;GO:0006351;GO:0006355;GO:0008270
PECH_007707		Nitrogen assimilation transcription factor	PF04082.18;PF00172.18	IPR001138;IPR007219;IPR036864	GO:0000981;GO:0003677;GO:0005634;GO:0006351;GO:0006355;GO:0008270
PECH_007714		Fungal Zn(2)-Cys(6) binuclear cluster domain-containing protein	PF00172.18	IPR001138;IPR036864	GO:0000981;GO:0005634;GO:0006355;GO:0008270
PECH_007732		Sterol uptake control protein 2	PF11951.8;PF00172.18	IPR001138;IPR021858;IPR036864	GO:0000981;GO:0005634;GO:0006355;GO:0008270
PECH_007739		Cellulolytic transcriptional activator ClrB-2-like protein	PF00172.18;PF04082.18	IPR007219;IPR001138;IPR036864	GO:0006355;GO:0006351;GO:0000981;GO:0008270;GO:0003677;GO:0005634
PECH_007786		Fungal Zn(2)-Cys(6) binuclear cluster domain-containing protein	PF04082.18;PF00172.18	IPR001138;IPR007219;IPR036864	GO:0000981;GO:0003677;GO:0005634;GO:0006351;GO:0006355;GO:0008270
PECH_007787		Fungal Zn(2)-Cys(6) binuclear cluster domain-containing protein	PF00172.18	IPR001138;IPR036864	GO:0000981;GO:0005634;GO:0006355;GO:0008270
PECH_007791		Homeobox transcription factor	PF00046.29	IPR001356;IPR009057;IPR017970	GO:0003677;GO:0006355;GO:0043565
PECH_007793		Fungal Zn(2)-Cys(6) binuclear cluster domain-containing protein	PF00172.18;PF04082.18	IPR007219;IPR001138;IPR036864	GO:0006355;GO:0006351;GO:0000981;GO:0008270;GO:0003677;GO:0005634
PECH_007810		Fungal Zn(2)-Cys(6) binuclear cluster domain-containing protein	PF00172.18	IPR001138;IPR036864	GO:0000981;GO:0005634;GO:0006355;GO:0008270
PECH_007823		BZIP transcription factor AtfA-like protein	PF11786.8;PF11785.8;PF11787.8;PF00170.21	IPR002112;IPR004827;IPR020956;IPR021755;IPR021756	GO:0003677;GO:0003700;GO:0006355
PECH_007829		Metallothionein expression activator	PF00096.26	IPR013087;IPR036236	GO:0003676
PECH_007846		Isochorismatase family protein	PF00857.20	IPR000868;IPR004330;IPR036380	GO:0003824;GO:0008152
PECH_007853		Fungal Zn(2)-Cys(6) binuclear cluster domain-containing protein	PF00172.18;PF04082.18	IPR007219;IPR001138;IPR036864	GO:0006355;GO:0006351;GO:0000981;GO:0008270;GO:0003677;GO:0005634
PECH_007857		Fungal Zn(2)-Cys(6) binuclear cluster domain-containing protein	PF00172.18;PF04082.18	IPR001138;IPR007219;IPR036864	GO:0000981;GO:0003677;GO:0005634;GO:0006351;GO:0006355;GO:0008270
PECH_007868		Fungal Zn(2)-Cys(6) binuclear cluster domain-containing protein	PF00172.18;PF04082.18	IPR001138;IPR007219;IPR036864	GO:0000981;GO:0003677;GO:0005634;GO:0006351;GO:0006355;GO:0008270
PECH_007907		GATA transcription factor LreB-like protein	PF00320.27;PF08447.12	IPR000014;IPR000679;IPR013088;IPR013655;IPR035965	GO:0005515;GO:0006355;GO:0008270;GO:0043565
PECH_007929		Positive regulator of purine utilization	PF04082.18;PF00172.18	IPR001138;IPR007219;IPR036864	GO:0000981;GO:0003677;GO:0005634;GO:0006351;GO:0006355;GO:0008270
PECH_007957		Transcriptional regulator RPN4-like protein	PF00096.26	IPR013087	GO:0003676
PECH_007968		Cellulolytic transcriptional activator ClrC-like protein		IPR004827	GO:0003700;GO:0006355
PECH_008003		Fungal Zn(2)-Cys(6) binuclear cluster domain-containing protein	PF00172.18;PF11951.8	IPR001138;IPR021858;IPR036864	GO:0000981;GO:0005634;GO:0006355;GO:0008270
PECH_008014		Fungal Zn(2)-Cys(6) binuclear cluster domain-containing protein	PF04082.18;PF00172.18	IPR001138;IPR007219;IPR036864	GO:0006355;GO:0006351;GO:0008270;GO:0000981;GO:0003677;GO:0005634
PECH_008036		Transcription factor NosA-like protein	PF11951.8;PF00172.18	IPR001138;IPR021858;IPR036864	GO:0000981;GO:0005634;GO:0006355;GO:0008270
PECH_008051		Fungal Zn(2)-Cys(6) binuclear cluster domain-containing protein	PF00172.18	IPR001138;IPR036864	GO:0000981;GO:0005634;GO:0006355;GO:0008270
PECH_008085		Zinc finger C2H2 type domain-containing protein		IPR013087	GO:0003676
PECH_008126		Repressor of filamentous growth 1	PF00505.19	IPR009071;IPR036910
PECH_008128		Zinc finger C2H2 type domain-containing protein	PF00096.26	IPR013087	GO:0003676
PECH_008159		Fungal Zn(2)-Cys(6) binuclear cluster domain-containing protein	PF11951.8;PF00172.18	IPR001138;IPR021858;IPR036864	GO:0000981;GO:0005634;GO:0006355;GO:0008270
PECH_008188		Basic-region helix-loop-helix (bHLH) transcription factor	PF09427.10;PF00010.26	IPR011598;IPR019006;IPR036638	GO:0032933;GO:0045944;GO:0046983
PECH_008194		Fungal Zn(2)-Cys(6) binuclear cluster domain-containing protein	PF04082.18;PF00172.18	IPR001138;IPR007219;IPR036864	GO:0000981;GO:0003677;GO:0005634;GO:0006351;GO:0006355;GO:0008270
PECH_008198		Copper-fist domain-containing protein	PF00649.18	IPR001083;IPR036395	GO:0006355;GO:0003677;GO:0003700;GO:0005507;GO:0005634
PECH_008207		Zinc finger C2H2 type domain-containing protein		IPR013087;IPR039327	GO:0003676;GO:0006355
PECH_008215		Fungal Zn(2)-Cys(6) binuclear cluster domain-containing protein	PF11951.8;PF00172.18	IPR001138;IPR021858;IPR036864	GO:0000981;GO:0005634;GO:0006355;GO:0008270
PECH_008235		Uncharacterized protein	PF00076.22	IPR000504;IPR012677;IPR035979	GO:0003676
PECH_008254		Myb-like DNA-binding domain-containing protein	PF00249.31	IPR001005;IPR009057;IPR017877;IPR017930	GO:0003677
PECH_008274		Fungal Zn(2)-Cys(6) binuclear cluster domain-containing protein		IPR001138;IPR036864	GO:0006355;GO:0008270;GO:0000981;GO:0005634
PECH_008279		Fungal Zn(2)-Cys(6) binuclear cluster domain-containing protein	PF11951.8	IPR001138;IPR021858;IPR036864	GO:0000981;GO:0005634;GO:0006355;GO:0008270
PECH_008283		Uncharacterized protein	PF00076.22	IPR000504;IPR012677;IPR025715;IPR035979	GO:0003676
PECH_008286		Zinc finger C3H1-type domain-containing protein	PF16543.5;PF00642.24	IPR000571;IPR032378;IPR036855	GO:0046872
PECH_008323		Fungal Zn(2)-Cys(6) binuclear cluster domain-containing protein	PF00172.18	IPR001138;IPR036864	GO:0000981;GO:0005634;GO:0006355;GO:0008270
PECH_008362		HTH Psq-type DNA-binding domain-containing protein	PF05225.16	IPR007889;IPR009057	GO:0003677
PECH_008387		Fungal Zn(2)-Cys(6) binuclear cluster domain-containing protein	PF00172.18	IPR001138;IPR036864	GO:0000981;GO:0005634;GO:0006355;GO:0008270
PECH_008398		Pre-mRNA-splicing factor cef1	PF11831.8;PF13921.6	IPR001005;IPR009057;IPR017930;IPR021786	GO:0003677
PECH_008404		PUF domain-containing protein	PF00806.19;PF00076.22	IPR000504;IPR001313;IPR011989;IPR012677;IPR016024;IPR033133;IPR035979	GO:0003676;GO:0003723;GO:0005488
PECH_008410		Fungal Zn(2)-Cys(6) binuclear cluster domain-containing protein	PF00172.18;PF04082.18	IPR007219;IPR001138;IPR011031;IPR036864	GO:0006355;GO:0006351;GO:0000981;GO:0008270;GO:0003677;GO:0005634
PECH_008415		RNA recognition motif-containing protein	PF00076.22;PF10378.9	IPR000504;IPR012677;IPR018835;IPR034195;IPR035979	GO:0003676
PECH_008419		Fungal Zn(2)-Cys(6) binuclear cluster domain-containing protein	PF00172.18	IPR001138;IPR036864	GO:0006355;GO:0008270;GO:0000981;GO:0005634
PECH_008461		Uncharacterized protein	PF00076.22	IPR000504;IPR012677;IPR035979	GO:0003676
PECH_008467		Uncharacterized protein	PF00076.22;PF13865.6	IPR000504;IPR012677;IPR025715;IPR035979	GO:0003676
PECH_008497		Uncharacterized protein	PF00076.22	IPR000504;IPR012677;IPR035979	GO:0003676
PECH_008501		Fungal Zn(2)-Cys(6) binuclear cluster domain-containing protein	PF11951.8;PF00172.18	IPR001138;IPR021858;IPR036864	GO:0000981;GO:0005634;GO:0006355;GO:0008270
PECH_008507		Cytoplasmic 60S subunit biogenesis factor REI1-like protein	PF12756.7;PF12171.8	IPR003604;IPR013087;IPR022755;IPR036236	GO:0003676;GO:0008270
PECH_008513		Fungal Zn(2)-Cys(6) binuclear cluster domain-containing protein	PF04082.18;PF00172.18	IPR000704;IPR001138;IPR007219;IPR036864	GO:0000981;GO:0003677;GO:0005634;GO:0005956;GO:0006351;GO:0006355;GO:0008270;GO:0019887
PECH_008530		Cellobiose response regulator ClbR2-like protein	PF04082.18;PF00172.18	IPR001138;IPR004507;IPR007219;IPR036864	GO:0000981;GO:0003677;GO:0005634;GO:0006351;GO:0006355;GO:0008270
PECH_008551		Fungal Zn(2)-Cys(6) binuclear cluster domain-containing protein	PF00172.18;PF11951.8	IPR021858;IPR001138;IPR036864	GO:0006355;GO:0000981;GO:0008270;GO:0005634
PECH_008571		PHD transcription factor Rum1-like protein	PF08429.11;PF02373.22;PF01388.21;PF02375.17;PF00628.29;PF02928.16	IPR001606;IPR001965;IPR003347;IPR003349;IPR004198;IPR011011;IPR013083;IPR013637;IPR019786;IPR019787;IPR036431	GO:0003677
PECH_008605		Fungal Zn(2)-Cys(6) transcription factor Ace3-like protein	PF04082.18;PF00172.18	IPR001138;IPR007219;IPR036864	GO:0000981;GO:0003677;GO:0005634;GO:0006351;GO:0006355;GO:0008270
PECH_008615		BZIP transcription factor	PF10297.9	IPR004827;IPR018287;IPR027328	GO:0003677;GO:0003700;GO:0005634;GO:0006355;GO:0008017
PECH_008640		Fungal Zn(2)-Cys(6) binuclear cluster domain-containing protein	PF04082.18;PF00172.18	IPR001138;IPR007219;IPR036864	GO:0000981;GO:0003677;GO:0005634;GO:0006351;GO:0006355;GO:0008270
PECH_008653		Basic-region helix-loop-helix (bHLH) transcription factor	PF00010.26	IPR011598;IPR036638	GO:0046983
PECH_008674		Fungal Zn(2)-Cys(6) binuclear cluster domain-containing protein	PF00172.18;PF04082.18	IPR007219;IPR001138;IPR036864	GO:0006355;GO:0006351;GO:0000981;GO:0008270;GO:0003677;GO:0005634
PECH_008676		Fungal Zn(2)-Cys(6) binuclear cluster domain-containing protein	PF00172.18;PF04082.18	IPR007219;IPR001138;IPR036864	GO:0006355;GO:0006351;GO:0000981;GO:0008270;GO:0003677;GO:0005634
PECH_008679		Fungal Zn(2)-Cys(6) binuclear cluster domain-containing protein	PF04082.18;PF00172.18	IPR001138;IPR007219;IPR036864	GO:0000981;GO:0003677;GO:0005634;GO:0006351;GO:0006355;GO:0008270
PECH_008760		Non-histone chromosomal protein 6	PF00505.19	IPR009071;IPR036910
PECH_008817		Uncharacterized protein	PF00076.22	IPR000504;IPR012677;IPR035979	GO:0003676
PECH_008885		Biofilm and cell wall regulator	PF00096.26	IPR013087;IPR036236	GO:0003676
PECH_008899		Fungal Zn(2)-Cys(6) binuclear cluster domain-containing protein	PF00172.18;PF04082.18	IPR001138;IPR007219;IPR036864	GO:0006355;GO:0006351;GO:0000981;GO:0008270;GO:0003677;GO:0005634
PECH_008902		Uncharacterized protein	PF00076.22;PF16842.5	IPR000504;IPR003107;IPR011990;IPR012677;IPR031766;IPR034397;IPR034398;IPR035979	GO:0003676;GO:0005515;GO:0006396
PECH_008913		BZIP transcription factor		IPR004827	GO:0003700;GO:0006355
PECH_008919		Acriflavine sensitivity control protein	PF11951.8;PF00172.18	IPR001138;IPR021858;IPR036864	GO:0000981;GO:0005634;GO:0006355;GO:0008270
PECH_008929		Fungal Zn(2)-Cys(6) binuclear cluster domain-containing protein		IPR001138;IPR036864	GO:0000981;GO:0005634;GO:0006355;GO:0008270
PECH_008982		Fungal Zn(2)-Cys(6) binuclear cluster domain-containing protein		IPR001138;IPR036864	GO:0000981;GO:0005634;GO:0006355;GO:0008270
PECH_008992		Fungal Zn(2)-Cys(6) binuclear cluster domain-containing protein	PF00172.18;PF04082.18	IPR001138;IPR007219;IPR036864	GO:0000981;GO:0003677;GO:0005634;GO:0006351;GO:0006355;GO:0008270
PECH_009017		Fungal Zn(2)-Cys(6) and C2H2 domain-containing protein	PF00096.26;PF00172.18;PF04082.18	IPR013087;IPR007219;IPR001138;IPR036864;IPR036236	GO:0006351;GO:0006355;GO:0003676;GO:0008270;GO:0003677;GO:0000981;GO:0005634

## Sheet: Penicillium oxalicum 114-2
Locus tag	Gene names	Protein names	Cross-reference (Pfam)	Cross-reference (InterPro)	Cross-reference (GO)
PDE_00052		Zn(2)-C6 fungal-type domain-containing protein	PF04082;PF00172;	IPR007219;IPR001138;IPR036864;	GO:0000981; GO:0003677; GO:0005634; GO:0006351; GO:0008270
PDE_00087	brlA	C2H2 type master regulator of conidiophore development brlA	PF00096;	IPR036236;IPR013087;	GO:0003677; GO:0005634; GO:0030435; GO:0046872; GO:0048315
PDE_00114		BZIP domain-containing protein	PF00170;	IPR004827;	GO:0003700
PDE_00136		C2H2-type domain-containing protein	PF17017;	IPR031514;IPR036236;IPR013087;	GO:0003676
PDE_00153		Copper-fist domain-containing protein	PF00649;	IPR001083;IPR036395;	GO:0003677; GO:0003700; GO:0005507; GO:0005634
PDE_00198		Zn(2)-C6 fungal-type domain-containing protein	PF04082;PF00172;	IPR007219;IPR001138;IPR036864;	GO:0000981; GO:0003677; GO:0005634; GO:0006351; GO:0008270
PDE_00230		Uncharacterized protein	PF00096;	IPR013087;	GO:0003676
PDE_00264		C2H2-type domain-containing protein	PF12171;	IPR040107;IPR022755;IPR036236;IPR013087;	GO:0000398; GO:0003676; GO:0005681; GO:0046872
PDE_00291		Uncharacterized protein		IPR001138;	GO:0000981; GO:0005634; GO:0008270
PDE_00293	PAN3	PAN2-PAN3 deadenylation complex subunit PAN3 (PAB1P-dependent poly(A)-specific ribonuclease) (Poly(A)-nuclease deadenylation complex subunit 3) (PAN deadenylation complex subunit 3)	PF18101;	IPR011009;IPR030844;IPR041332;IPR000719;IPR000571;	GO:0000289; GO:0003723; GO:0004672; GO:0005524; GO:0006397; GO:0031251; GO:0046872
PDE_00297		C2H2-type domain-containing protein	PF00096;	IPR036236;IPR013087;	GO:0003676
PDE_00300		Zn(2)-C6 fungal-type domain-containing protein	PF04082;PF00172;	IPR007219;IPR001138;IPR036864;	GO:0000981; GO:0003677; GO:0005634; GO:0006351; GO:0008270
PDE_00319		Zn(2)-C6 fungal-type domain-containing protein	PF11951;PF00172;	IPR021858;IPR001138;IPR036864;	GO:0000981; GO:0005634; GO:0008270
PDE_00349		BHLH domain-containing protein	PF00010;	IPR011598;IPR036638;	GO:0046983
PDE_00354		Zn(2)-C6 fungal-type domain-containing protein	PF00172;	IPR001138;IPR036864;	GO:0000981; GO:0005634; GO:0008270
PDE_00436		Zn(2)-C6 fungal-type domain-containing protein	PF04082;PF00172;	IPR007219;IPR001138;IPR036864;	GO:0000981; GO:0003677; GO:0005634; GO:0006351; GO:0008270
PDE_00451		Zn(2)-C6 fungal-type domain-containing protein	PF04082;PF00172;	IPR007219;IPR001138;IPR036864;	GO:0000981; GO:0003677; GO:0005634; GO:0006351; GO:0008270
PDE_00454		Uncharacterized protein	PF05920;	IPR009057;IPR001356;IPR008422;IPR013087;	GO:0003677; GO:0005634; GO:0006355
PDE_00471		Zn(2)-C6 fungal-type domain-containing protein	PF04082;PF00172;	IPR007219;IPR001138;IPR036864;	GO:0000981; GO:0003677; GO:0005634; GO:0006351; GO:0008270
PDE_00479		BHLH domain-containing protein	PF00010;	IPR011598;IPR036638;	GO:0046983
PDE_00483		Zn(2)-C6 fungal-type domain-containing protein	PF04082;PF00172;	IPR007219;IPR001138;IPR036864;	GO:0000981; GO:0003677; GO:0005634; GO:0006351; GO:0008270
PDE_00486		Zn(2)-C6 fungal-type domain-containing protein	PF11951;PF00172;	IPR021858;IPR001138;IPR036864;	GO:0000981; GO:0005634; GO:0008270
PDE_00496		Zn(2)-C6 fungal-type domain-containing protein	PF04082;PF00172;	IPR007219;IPR001138;IPR036864;	GO:0000981; GO:0003677; GO:0005634; GO:0006351; GO:0008270
PDE_00510		Zn(2)-C6 fungal-type domain-containing protein	PF11951;PF00172;	IPR021858;IPR001138;IPR036864;	GO:0000981; GO:0005634; GO:0008270
PDE_00521		Zn(2)-C6 fungal-type domain-containing protein	PF04082;PF00172;	IPR007219;IPR001138;IPR036864;	GO:0000981; GO:0003677; GO:0005634; GO:0006351; GO:0008270
PDE_00526		Uncharacterized protein	PF15519;PF00076;	IPR012677;IPR035979;IPR029123;IPR006509;IPR000504;	GO:0003723; GO:0005634; GO:0006397
PDE_00531		Zn(2)-C6 fungal-type domain-containing protein	PF00172;	IPR001138;IPR036864;	GO:0000981; GO:0005634; GO:0008270
PDE_00538		BZIP domain-containing protein	PF00170;	IPR004827;	GO:0003700
PDE_00548		Zn(2)-C6 fungal-type domain-containing protein	PF04082;PF00172;	IPR007219;IPR001138;IPR036864;	GO:0000981; GO:0003677; GO:0005634; GO:0006351; GO:0008270
PDE_00562		Zn(2)-C6 fungal-type domain-containing protein	PF04082;PF00172;	IPR007219;IPR001138;IPR036864;	GO:0000981; GO:0003677; GO:0005634; GO:0006351; GO:0008270
PDE_00567		tRNA-dihydrouridine(47) synthase [NAD(P)(+)] (EC 1.3.1.89) (tRNA-dihydrouridine synthase 3)	PF01207;	IPR013785;IPR035587;IPR001269;IPR018517;IPR000571;	GO:0046872; GO:0050660; GO:0102265
PDE_00574		Uncharacterized protein		IPR036236;IPR013087;	GO:0003676
PDE_00588		R3H domain-containing protein	PF01424;PF01422;	IPR034078;IPR001374;IPR036867;IPR034077;IPR019786;IPR000967;	GO:0003676; GO:0003700; GO:0005634; GO:0008270
PDE_00678		Uncharacterized protein	PF00076;	IPR012677;IPR035979;IPR000504;IPR034393;	GO:0003723
PDE_00701		Uncharacterized protein	PF05383;PF00076;	IPR006630;IPR002344;IPR012677;IPR035979;IPR000504;IPR036388;IPR036390;	GO:0003723; GO:0005634; GO:0006396; GO:1990904
PDE_00722		Uncharacterized protein		IPR001138;	GO:0000981; GO:0005634; GO:0008270
PDE_00746		Uncharacterized protein	PF00076;	IPR012677;IPR034509;IPR034639;IPR035979;IPR000504;IPR003954;	GO:0003723
PDE_00826		Zn(2)-C6 fungal-type domain-containing protein	PF04082;PF00172;	IPR007219;IPR001138;IPR036864;	GO:0000981; GO:0003677; GO:0005634; GO:0006351; GO:0008270
PDE_00858		Uncharacterized protein	PF11951;	IPR021858;IPR001138;IPR036864;	GO:0000981; GO:0005634; GO:0008270
PDE_00895		Uncharacterized protein	PF00096;	IPR036236;IPR013087;	GO:0003676
PDE_00921		RRM domain-containing protein		IPR012677;IPR035979;IPR000504;	GO:0003723
PDE_00926		C3H1-type domain-containing protein	PF10453;PF18044;	IPR019496;IPR041367;IPR000571;IPR036855;	GO:0046872
PDE_00937		Uncharacterized protein		IPR013087;	GO:0003676
PDE_00938		Uncharacterized protein		IPR036236;IPR013087;	GO:0003676
PDE_00959		Zn(2)-C6 fungal-type domain-containing protein	PF04082;	IPR007219;IPR001138;IPR036864;	GO:0000981; GO:0003677; GO:0005634; GO:0006351; GO:0008270
PDE_00973		NDT80 domain-containing protein	PF05224;	IPR024061;IPR037141;IPR008967;	GO:0003677; GO:0003700
PDE_00983		Zn(2)-C6 fungal-type domain-containing protein	PF04082;PF00172;	IPR007219;IPR001138;IPR036864;	GO:0000981; GO:0003677; GO:0005634; GO:0006351; GO:0008270
PDE_01005		Uncharacterized protein	PF00076;	IPR012677;IPR035979;IPR000504;IPR034158;IPR034159;	GO:0003723
PDE_01025		Uncharacterized protein	PF00096;	IPR036236;IPR013087;	GO:0003676
PDE_01027		Uncharacterized protein	PF00400;	IPR037289;IPR000418;IPR020472;IPR015943;IPR001680;IPR017986;IPR036322;	GO:0002098; GO:0003700; GO:0033588; GO:0043565
PDE_01035		tRNA dimethylallyltransferase (EC 2.5.1.75)	PF01715;	IPR039657;IPR030666;IPR018022;IPR027417;IPR036236;IPR013087;	GO:0003676; GO:0005524; GO:0005737; GO:0008033; GO:0052381
PDE_01040		Zn(2)-C6 fungal-type domain-containing protein	PF04082;PF00172;	IPR007219;IPR001138;IPR036864;	GO:0000981; GO:0003677; GO:0005634; GO:0006351; GO:0008270
PDE_01167		Zn(2)-C6 fungal-type domain-containing protein		IPR001138;IPR036864;	GO:0000981; GO:0005634; GO:0008270
PDE_01196		Zn(2)-C6 fungal-type domain-containing protein	PF00172;	IPR001138;IPR036864;	GO:0000981; GO:0005634; GO:0008270
PDE_01231		Zn(2)-C6 fungal-type domain-containing protein	PF04082;PF00172;	IPR007219;IPR001138;IPR036864;	GO:0000981; GO:0003677; GO:0005634; GO:0006351; GO:0008270
PDE_01234		Zn(2)-C6 fungal-type domain-containing protein	PF04082;PF00172;	IPR007219;IPR001138;IPR036864;	GO:0000981; GO:0003677; GO:0005634; GO:0006351; GO:0008270
PDE_01240		Zn(2)-C6 fungal-type domain-containing protein		IPR001138;IPR036864;	GO:0000981; GO:0005634; GO:0008270
PDE_01258		Zn(2)-C6 fungal-type domain-containing protein	PF04082;PF00172;	IPR007219;IPR001138;IPR036864;	GO:0000981; GO:0003677; GO:0005634; GO:0006351; GO:0008270
PDE_01297		BZIP domain-containing protein	PF00170;	IPR004827;	GO:0003700
PDE_01348		BHLH domain-containing protein	PF00010;	IPR011598;IPR036638;	GO:0046983
PDE_01364		C2H2-type domain-containing protein		IPR013087;	GO:0003676
PDE_01367		RRM domain-containing protein	PF00076;	IPR039171;IPR012677;IPR035979;IPR000504;IPR034356;	GO:0000398; GO:0003723
PDE_01373		Zn(2)-C6 fungal-type domain-containing protein	PF11951;PF00172;	IPR021858;IPR001138;IPR036864;	GO:0000981; GO:0005634; GO:0008270
PDE_01396		C2H2-type domain-containing protein	PF10357;	IPR019447;IPR037321;IPR038254;IPR036236;IPR013087;	GO:0003676
PDE_01400		Uncharacterized protein	PF00642;	IPR012677;IPR035979;IPR000504;IPR009145;IPR000571;	GO:0000398; GO:0003723; GO:0046872; GO:0089701
PDE_01419		Zn(2)-C6 fungal-type domain-containing protein	PF00172;	IPR001138;IPR036864;	GO:0000981; GO:0005634; GO:0008270
PDE_01436		BZIP domain-containing protein	PF07716;	IPR004827;	GO:0003700
PDE_01447		C2H2-type domain-containing protein		IPR036236;IPR013087;	GO:0003676
PDE_01485		Uncharacterized protein	PF00226;PF12171;	IPR001623;IPR018253;IPR036869;IPR003604;IPR022755;IPR036236;IPR013087;	GO:0003676; GO:0008270
PDE_01511		OTU domain-containing protein	PF02338;	IPR039138;IPR003323;IPR038765;IPR013087;	GO:0003676; GO:0004843; GO:0016579; GO:0030433
PDE_01513		Uncharacterized protein	PF00642;PF18044;	IPR041367;IPR000571;IPR036855;	GO:0046872
PDE_01531		Uncharacterized protein	PF00320;PF08447;PF13426;	IPR001610;IPR000014;IPR035965;IPR013655;IPR000679;IPR013088;	GO:0006355; GO:0008270; GO:0043565
PDE_01536		Zn(2)-C6 fungal-type domain-containing protein	PF00172;	IPR001138;IPR036864;	GO:0000981; GO:0005634; GO:0008270
PDE_01544		Uncharacterized protein	PF00076;	IPR012677;IPR035979;IPR000504;	GO:0003723
PDE_01570		Zn(2)-C6 fungal-type domain-containing protein	PF00172;	IPR007219;IPR001138;IPR036864;	GO:0000981; GO:0003677; GO:0005634; GO:0006351; GO:0008270
PDE_01597		RRM domain-containing protein	PF00076;	IPR012677;IPR035979;IPR000504;	GO:0003723
PDE_01606		RRM domain-containing protein	PF00076;	IPR012677;IPR035979;IPR000504;	GO:0003723
PDE_01613		HMG box domain-containing protein	PF00505;	IPR009071;IPR036910;	GO:0003677; GO:0005634
PDE_01645		Zn(2)-C6 fungal-type domain-containing protein	PF11951;PF00172;	IPR021858;IPR001138;IPR036864;	GO:0000981; GO:0005634; GO:0008270
PDE_01657		Uncharacterized protein	PF00076;	IPR012677;IPR035979;IPR000504;	GO:0003723
PDE_01679		Zn(2)-C6 fungal-type domain-containing protein	PF04082;PF00172;	IPR007219;IPR001138;IPR036864;	GO:0000981; GO:0003677; GO:0005634; GO:0006351; GO:0008270
PDE_01694		C3H1-type domain-containing protein	PF16768;PF18044;	IPR031908;IPR041367;IPR000571;IPR036855;	GO:0046872
PDE_01706		C2H2-type domain-containing protein		IPR036236;IPR013087;	GO:0003676; GO:0016021
PDE_01749		Zn(2)-C6 fungal-type domain-containing protein	PF04082;PF00172;	IPR007219;IPR001138;IPR036864;	GO:0000981; GO:0003677; GO:0005634; GO:0006351; GO:0008270
PDE_01753		Zn(2)-C6 fungal-type domain-containing protein	PF04082;PF00172;	IPR007219;IPR001138;IPR036864;	GO:0000981; GO:0003677; GO:0005634; GO:0006351; GO:0008270
PDE_01757		Uncharacterized protein	PF01585;PF00076;PF00641;	IPR000467;IPR012677;IPR035979;IPR000504;IPR001876;IPR036443;	GO:0003723; GO:0046872
PDE_01792		Zn(2)-C6 fungal-type domain-containing protein	PF00172;	IPR001138;IPR036864;	GO:0000981; GO:0005634; GO:0008270
PDE_01795		Myb-like domain-containing protein	PF00249;	IPR009057;IPR017877;IPR001005;	GO:0003677
PDE_01813		Uncharacterized protein	PF00249;	IPR009057;IPR017930;IPR001005;	GO:0003677
PDE_01826		Zn(2)-C6 fungal-type domain-containing protein	PF04082;PF03902;PF00172;	IPR005600;IPR007219;IPR001138;IPR036864;	GO:0000981; GO:0003677; GO:0005634; GO:0006351; GO:0008270; GO:0016021
PDE_01911		RRM domain-containing protein	PF00076;	IPR012677;IPR035979;IPR000504;	GO:0003723
PDE_01919		MADS-box domain-containing protein	PF00319;	IPR033896;IPR002100;IPR036879;	GO:0000977; GO:0005634; GO:0045944; GO:0046983
PDE_01952		Zn(2)-C6 fungal-type domain-containing protein	PF00172;	IPR001138;IPR036864;	GO:0000981; GO:0005634; GO:0008270
PDE_01979		Zn(2)-C6 fungal-type domain-containing protein	PF04082;	IPR007219;IPR001138;IPR036864;	GO:0000981; GO:0003677; GO:0005634; GO:0006351; GO:0008270
PDE_01988		Cys2-His2 zinc finger transcription factor AceA		IPR013087;	GO:0003676
PDE_02012		Zn(2)-C6 fungal-type domain-containing protein	PF00172;	IPR001138;IPR036864;	GO:0000981; GO:0005634; GO:0008270
PDE_02013		C3H1-type domain-containing protein	PF18044;	IPR041367;IPR000571;IPR036855;	GO:0046872
PDE_02018		Uncharacterized protein	PF01363;PF11464;	IPR036531;IPR021565;IPR013087;IPR000306;IPR017455;IPR011011;IPR006642;IPR013083;	GO:0003677; GO:0006281; GO:0046872
PDE_02029		GATA-type domain-containing protein	PF00320;	IPR000679;IPR013088;	GO:0006355; GO:0008270; GO:0043565
PDE_02036		Uncharacterized protein	PF00023;PF04383;	IPR002110;IPR020683;IPR036770;IPR036887;IPR018004;IPR029793;IPR003163;	GO:0000083; GO:0003677; GO:0030907
PDE_02054		Uncharacterized protein		IPR013087;	GO:0003676
PDE_02064		BZIP domain-containing protein	PF00170;	IPR004827;	GO:0003700
PDE_02136		BHLH domain-containing protein	PF00010;	IPR011598;IPR036638;	GO:0046983
PDE_02161		RFX-type winged-helix domain-containing protein	PF02257;	IPR003150;IPR039779;IPR036388;IPR036390;	GO:0003677; GO:0003700
PDE_02163		Zn(2)-C6 fungal-type domain-containing protein	PF04082;PF00172;	IPR007219;IPR001138;IPR036864;	GO:0000981; GO:0003677; GO:0005634; GO:0006351; GO:0008270; GO:0016021
PDE_02184		Uncharacterized protein	PF04082;	IPR007219;IPR036236;IPR013087;	GO:0003677; GO:0005634; GO:0006351; GO:0008270
PDE_02229		Uncharacterized protein	PF00076;	IPR012677;IPR035979;IPR000504;	GO:0003723
PDE_02235		Zn(2)-C6 fungal-type domain-containing protein	PF04082;PF00172;	IPR007219;IPR001138;IPR036864;	GO:0000981; GO:0003677; GO:0005634; GO:0006351; GO:0008270
PDE_02308		Fork-head domain-containing protein	PF00250;	IPR001766;IPR030456;IPR036388;IPR036390;	GO:0003700; GO:0005634; GO:0043565
PDE_02338		Zn(2)-C6 fungal-type domain-containing protein	PF04082;PF00172;	IPR007219;IPR001138;IPR036864;	GO:0000981; GO:0003677; GO:0005634; GO:0006351; GO:0008270
PDE_02360		Uncharacterized protein	PF00249;	IPR009057;IPR017877;IPR017930;IPR001005;	GO:0003677
PDE_02373		Zn(2)-C6 fungal-type domain-containing protein	PF04082;PF00172;	IPR007219;IPR001138;IPR036864;	GO:0000981; GO:0003677; GO:0005634; GO:0006351; GO:0008270
PDE_02388		RRM domain-containing protein	PF10443;PF00076;	IPR018850;IPR035979;IPR000504;IPR039627;IPR034260;	GO:0000002; GO:0003723; GO:0031305
PDE_02456		Zn(2)-C6 fungal-type domain-containing protein	PF04082;PF00172;	IPR007219;IPR001138;IPR036864;	GO:0000981; GO:0003677; GO:0005634; GO:0006351; GO:0008270
PDE_02508		RRM domain-containing protein	PF00076;	IPR012677;IPR035979;IPR000504;	GO:0003723
PDE_02512		Zn(2)-C6 fungal-type domain-containing protein	PF04082;PF00172;	IPR007219;IPR001138;IPR036864;	GO:0000981; GO:0003677; GO:0005634; GO:0006351; GO:0008270
PDE_02517		Zn(2)-C6 fungal-type domain-containing protein	PF11951;PF00172;	IPR021858;IPR001138;IPR036864;	GO:0000981; GO:0005634; GO:0008270
PDE_02566		BZIP domain-containing protein		IPR004827;	GO:0003700
PDE_02584		Uncharacterized protein	PF00096;	IPR036236;IPR013087;	GO:0003676
PDE_02638		Zn(2)-C6 fungal-type domain-containing protein	PF00172;	IPR001138;IPR036864;	GO:0000981; GO:0005634; GO:0008270; GO:0016021
PDE_02646		Uncharacterized protein	PF04082;PF00172;	IPR007219;IPR001138;IPR036864;	GO:0000981; GO:0003677; GO:0005634; GO:0006351; GO:0008270
PDE_02659		Uncharacterized protein	PF11951;	IPR021858;IPR001138;IPR036864;	GO:0000981; GO:0005634; GO:0008270
PDE_02679		Zn(2)-C6 fungal-type domain-containing protein		IPR001138;IPR036864;	GO:0000981; GO:0005634; GO:0008270
PDE_02741		Zn(2)-C6 fungal-type domain-containing protein	PF04082;PF00172;	IPR007219;IPR001138;IPR036864;	GO:0000981; GO:0003677; GO:0005634; GO:0006351; GO:0008270
PDE_02765		HTH CENPB-type domain-containing protein	PF04218;PF03221;	IPR009057;IPR006600;IPR007889;	GO:0003677
PDE_02772		Zn(2)-C6 fungal-type domain-containing protein	PF04082;PF00172;	IPR007219;IPR001138;IPR036864;	GO:0000981; GO:0003677; GO:0005634; GO:0006351; GO:0008270
PDE_02773		Zn(2)-C6 fungal-type domain-containing protein	PF00172;	IPR001138;IPR036864;	GO:0000981; GO:0005634; GO:0008270
PDE_02807		Zn(2)-C6 fungal-type domain-containing protein		IPR001138;	GO:0000981; GO:0005634; GO:0008270
PDE_02813		Uncharacterized protein		IPR003656;IPR013087;	GO:0003677
PDE_02821		Zn(2)-C6 fungal-type domain-containing protein	PF00172;	IPR001138;IPR036864;	GO:0000981; GO:0005634; GO:0008270
PDE_02827		Zn(2)-C6 fungal-type domain-containing protein	PF04082;PF00172;	IPR007219;IPR001138;IPR036864;	GO:0000981; GO:0003677; GO:0005634; GO:0006351; GO:0008270
PDE_02833		Zn(2)-C6 fungal-type domain-containing protein	PF04082;PF00172;	IPR007219;IPR001138;IPR036864;	GO:0000981; GO:0003677; GO:0005634; GO:0006351; GO:0008270
PDE_02852		Uncharacterized protein	PF04082;PF00096;	IPR007219;IPR036236;IPR013087;	GO:0003677; GO:0005634; GO:0006351; GO:0008270
PDE_02856		Zn(2)-C6 fungal-type domain-containing protein	PF04082;PF00172;	IPR007219;IPR001138;IPR036864;	GO:0000981; GO:0003677; GO:0005634; GO:0006351; GO:0008270
PDE_02858		Polyadenylate-binding protein (PABP)	PF00658;PF00076;	IPR012677;IPR036053;IPR006515;IPR002004;IPR035979;IPR000504;	GO:0003723; GO:0005737
PDE_02887		C2H2-type domain-containing protein		IPR013087;	GO:0003676
PDE_02901		Zn(2)-C6 fungal-type domain-containing protein	PF04082;PF00172;	IPR007219;IPR001138;IPR036864;	GO:0000981; GO:0003677; GO:0005634; GO:0006351; GO:0008270
PDE_02914		HMG box domain-containing protein	PF00505;	IPR009071;IPR036910;	GO:0003677; GO:0005634
PDE_02932		TEA domain-containing protein	PF01285;	IPR000818;IPR038096;	GO:0003700
PDE_02934		Uncharacterized protein	PF00076;	IPR034482;IPR012677;IPR035979;IPR000504;	GO:0003723
PDE_02962		Uncharacterized protein	PF00096;	IPR036236;IPR013087;	GO:0003676
PDE_03008		Uncharacterized protein	PF00249;	IPR009057;IPR015495;IPR017930;IPR001005;	GO:0003677; GO:0005634
PDE_03020		C2H2-type domain-containing protein		IPR036236;IPR013087;	GO:0003676
PDE_03023		Uncharacterized protein	PF00096;	IPR036236;IPR013087;	GO:0003676
PDE_03032		RRM domain-containing protein	PF00076;	IPR012677;IPR035979;IPR000504;	GO:0003723
PDE_03054		Uncharacterized protein	PF00642;	IPR000571;IPR036855;	GO:0046872
PDE_03129		Zn(2)-C6 fungal-type domain-containing protein	PF11951;PF00172;	IPR021858;IPR001138;IPR036864;	GO:0000981; GO:0005634; GO:0008270
PDE_03168		Catabolite repressor CreA	PF00096;	IPR036236;IPR013087;	GO:0003676
PDE_03204		Zn(2)-C6 fungal-type domain-containing protein	PF00172;	IPR001138;IPR036864;	GO:0000981; GO:0005634; GO:0008270
PDE_03225		BHLH domain-containing protein	PF00010;	IPR011598;IPR036638;	GO:0046983
PDE_03264		BZIP domain-containing protein	PF00170;PF08601;	IPR004827;IPR013910;IPR023167;	GO:0003700
PDE_03268		Zn(2)-C6 fungal-type domain-containing protein	PF04082;PF00172;	IPR007219;IPR001138;IPR036864;	GO:0000981; GO:0003677; GO:0005634; GO:0006351; GO:0008270
PDE_03271		Zn(2)-C6 fungal-type domain-containing protein	PF11951;PF00172;	IPR021858;IPR001138;IPR036864;	GO:0000981; GO:0005634; GO:0008270
PDE_03298		Zn(2)-C6 fungal-type domain-containing protein	PF04082;PF00172;	IPR007219;IPR001138;IPR036864;	GO:0000981; GO:0003677; GO:0005634; GO:0006351; GO:0008270
PDE_03324		Uncharacterized protein	PF00096;	IPR036236;IPR013087;	GO:0003676
PDE_03331		Zn(2)-C6 fungal-type domain-containing protein	PF00172;	IPR001138;IPR036864;	GO:0000981; GO:0005634; GO:0008270
PDE_03334		GATA-type domain-containing protein	PF07573;PF08550;PF00320;	IPR013860;IPR011420;IPR039355;IPR000679;IPR013088;	GO:0003700; GO:0005634; GO:0008270; GO:0042128; GO:0043565
PDE_03353		MADS-box domain-containing protein	PF00319;	IPR033897;IPR002100;IPR036879;	GO:0000981; GO:0000987; GO:0005634; GO:0045944; GO:0046983
PDE_03377		RRM domain-containing protein	PF00076;	IPR012677;IPR035979;IPR000504;	GO:0003723
PDE_03379		Zn(2)-C6 fungal-type domain-containing protein	PF00172;	IPR001138;IPR036864;	GO:0000981; GO:0005634; GO:0008270
PDE_03425		Uncharacterized protein	PF00096;	IPR036236;IPR013087;	GO:0003676
PDE_03467		Uncharacterized protein	PF04082;PF00096;PF00172;	IPR007219;IPR001138;IPR036864;IPR036236;IPR013087;	GO:0000981; GO:0003677; GO:0005634; GO:0006351; GO:0008270; GO:0016021
PDE_03582		SANT domain-containing protein	PF15963;	IPR017174;IPR009057;IPR001005;IPR039467;	GO:0000126; GO:0000995; GO:0003677
PDE_03610		Zn(2)-C6 fungal-type domain-containing protein		IPR001138;IPR036864;	GO:0000981; GO:0005634; GO:0008270
PDE_03624		C2H2-type domain-containing protein		IPR036236;IPR013087;	GO:0003676
PDE_03679		Uncharacterized protein	PF07529;	IPR009057;IPR014012;IPR017877;IPR001005;	GO:0003677
PDE_03694		Zn(2)-C6 fungal-type domain-containing protein	PF11951;PF00172;	IPR021858;IPR001138;IPR036864;	GO:0000981; GO:0005634; GO:0008270
PDE_03737		Uncharacterized protein	PF01480;	IPR012677;IPR002483;IPR036483;IPR035979;IPR034268;IPR000504;	GO:0003723; GO:0006397
PDE_03752	TIF35	Eukaryotic translation initiation factor 3 subunit G (eIF3g) (Eukaryotic translation initiation factor 3 RNA-binding subunit) (eIF-3 RNA-binding subunit) (Translation initiation factor eIF3 p33 subunit homolog) (eIF3 p33 homolog)	PF12353;PF00076;	IPR017334;IPR024675;IPR034240;IPR012677;IPR035979;IPR000504;	GO:0001732; GO:0003743; GO:0005852; GO:0016282; GO:0033290
PDE_03754		NDT80 domain-containing protein	PF05224;	IPR024061;IPR037141;IPR008967;	GO:0003677; GO:0003700
PDE_03767		RRM domain-containing protein	PF00076;	IPR012677;IPR035979;IPR000504;	GO:0003723
PDE_03825		Transcriptional adapter 2	PF00249;PF04433;PF00569;	IPR041983;IPR016827;IPR009057;IPR001005;IPR017884;IPR007526;IPR000433;	GO:0003677; GO:0003713; GO:0005634; GO:0006357; GO:0008270; GO:0035065
PDE_03834		C2H2-type domain-containing protein		IPR036236;IPR013087;	GO:0003676
PDE_03852		C2H2-type domain-containing protein		IPR039327;IPR013087;	GO:0003676; GO:0006355
PDE_03860		Zn(2)-C6 fungal-type domain-containing protein	PF11951;PF00172;	IPR021858;IPR001138;IPR036864;	GO:0000981; GO:0005634; GO:0008270
PDE_03880		RRM domain-containing protein	PF00076;	IPR039119;IPR012677;IPR035979;IPR000504;	GO:0003723
PDE_03898		Zn(2)-C6 fungal-type domain-containing protein	PF00172;	IPR001138;IPR036864;	GO:0000981; GO:0005634; GO:0008270
PDE_03903		Zn(2)-C6 fungal-type domain-containing protein	PF00172;	IPR001138;IPR036864;	GO:0000981; GO:0005634; GO:0008270
PDE_03936		Uncharacterized protein	PF00096;	IPR036236;IPR013087;	GO:0003676
PDE_03945		Homeobox domain-containing protein	PF00046;	IPR009057;IPR017970;IPR001356;	GO:0005634; GO:0006355; GO:0043565
PDE_03960		Uncharacterized protein		IPR001138;	GO:0000981; GO:0005634; GO:0008270
PDE_03964		Zn(2)-C6 fungal-type domain-containing protein	PF04082;PF00172;	IPR007219;IPR001138;IPR036864;	GO:0000981; GO:0003677; GO:0005634; GO:0006351; GO:0008270
PDE_03967		Zn(2)-C6 fungal-type domain-containing protein	PF00172;	IPR001138;IPR036864;	GO:0000981; GO:0005634; GO:0008270
PDE_03970		Homeobox domain-containing protein	PF05920;	IPR009057;IPR001356;IPR008422;	GO:0003677; GO:0005634; GO:0006355
PDE_03981		Myb-like domain-containing protein		IPR009057;IPR017877;IPR001005;	GO:0003677
PDE_03999		C2H2-type domain-containing protein	PF14811;PF12171;	IPR029404;IPR022755;IPR036236;IPR013087;	GO:0003676; GO:0030218; GO:0046872
PDE_04005		C2H2-type domain-containing protein	PF11917;	IPR021842;IPR013087;	GO:0003676
PDE_04009		Zn(2)-C6 fungal-type domain-containing protein	PF00172;	IPR001138;IPR036864;	GO:0000981; GO:0005634; GO:0008270
PDE_04012		BHLH domain-containing protein	PF00010;	IPR011598;IPR036638;	GO:0046983
PDE_04046		Zn(2)-C6 fungal-type domain-containing protein	PF00172;	IPR001138;IPR036864;	GO:0000981; GO:0005634; GO:0008270
PDE_04058		RRM domain-containing protein	PF00076;	IPR012677;IPR035979;IPR000504;IPR034403;	GO:0003723
PDE_04089		Uncharacterized protein	PF00096;PF12171;	IPR022755;IPR036236;IPR013087;	GO:0003676; GO:0046872
PDE_04095		HTH APSES-type domain-containing protein		IPR036887;IPR018004;IPR003163;	GO:0003677
PDE_04102		Zn(2)-C6 fungal-type domain-containing protein	PF00172;	IPR001138;IPR036864;	GO:0000981; GO:0005634; GO:0008270
PDE_04129		Zn(2)-C6 fungal-type domain-containing protein	PF04082;PF00172;	IPR007219;IPR001138;IPR036864;	GO:0000981; GO:0003677; GO:0005634; GO:0006351; GO:0008270
PDE_04139		Zn(2)-C6 fungal-type domain-containing protein	PF04082;PF00172;	IPR007219;IPR001138;IPR036864;	GO:0000981; GO:0003677; GO:0005634; GO:0006351; GO:0008270
PDE_04152		Zn(2)-C6 fungal-type domain-containing protein	PF00172;	IPR007219;IPR001138;IPR036864;	GO:0000981; GO:0003677; GO:0005634; GO:0006351; GO:0008270
PDE_04203		Nuclear cap-binding protein subunit 2 (20 kDa nuclear cap-binding protein)	PF00076;	IPR027157;IPR034148;IPR012677;IPR035979;IPR000504;	GO:0000339; GO:0005634; GO:0005846; GO:0045292
PDE_04257		Zn(2)-C6 fungal-type domain-containing protein		IPR001138;IPR036864;	GO:0000981; GO:0005634; GO:0008270
PDE_04262		Zn(2)-C6 fungal-type domain-containing protein	PF00172;	IPR001138;IPR036864;	GO:0000981; GO:0005634; GO:0008270
PDE_04266		Zn(2)-C6 fungal-type domain-containing protein	PF04082;PF00172;	IPR007219;IPR001138;IPR036864;	GO:0000981; GO:0003677; GO:0005634; GO:0006351; GO:0008270
PDE_04295		Zn(2)-C6 fungal-type domain-containing protein	PF00172;	IPR001138;IPR036864;	GO:0000981; GO:0005634; GO:0008270
PDE_04311		Zn(2)-C6 fungal-type domain-containing protein	PF04082;PF00172;	IPR007219;IPR004507;IPR001138;IPR036864;	GO:0000981; GO:0003677; GO:0005634; GO:0006351; GO:0008270
PDE_04337		RRM domain-containing protein	PF14327;PF14304;PF00076;	IPR038192;IPR025742;IPR026896;IPR012677;IPR035979;IPR000504;	GO:0003723; GO:0031124
PDE_04396		Zn(2)-C6 fungal-type domain-containing protein	PF00172;	IPR007219;IPR001138;IPR036864;	GO:0000981; GO:0003677; GO:0005634; GO:0006351; GO:0008270
PDE_04408		Zn(2)-C6 fungal-type domain-containing protein	PF04082;PF00172;	IPR007219;IPR001138;IPR036864;	GO:0000981; GO:0003677; GO:0005634; GO:0006351; GO:0008270
PDE_04412		Zn(2)-C6 fungal-type domain-containing protein	PF04082;PF00172;	IPR007219;IPR001138;IPR036864;	GO:0000981; GO:0003677; GO:0005634; GO:0006351; GO:0008270
PDE_04461		Zn(2)-C6 fungal-type domain-containing protein	PF04082;PF00172;	IPR007219;IPR001138;IPR036864;	GO:0000981; GO:0003677; GO:0005634; GO:0006351; GO:0008270
PDE_04481		Zn(2)-C6 fungal-type domain-containing protein	PF11951;PF00172;	IPR021858;IPR001138;IPR036864;	GO:0000981; GO:0005634; GO:0008270
PDE_04501		BZIP domain-containing protein		IPR004827;	GO:0003700
PDE_04503		Zn(2)-C6 fungal-type domain-containing protein	PF04082;PF00172;	IPR007219;IPR001138;IPR036864;	GO:0000981; GO:0003677; GO:0005634; GO:0006351; GO:0008270
PDE_04522		RING-type domain-containing protein		IPR041888;IPR013087;IPR001841;IPR013083;	GO:0003676
PDE_04524	PRT1	Eukaryotic translation initiation factor 3 subunit B (eIF3b) (Eukaryotic translation initiation factor 3 90 kDa subunit homolog) (eIF3 p90) (Translation initiation factor eIF3, p90 subunit homolog)	PF08662;PF00076;	IPR011400;IPR034363;IPR012677;IPR035979;IPR000504;IPR013979;IPR015943;	GO:0001732; GO:0003743; GO:0005852; GO:0016282; GO:0031369; GO:0033290
PDE_04559		Uncharacterized protein	PF04082;PF00096;	IPR007219;IPR036236;IPR013087;	GO:0003677; GO:0005634; GO:0006351; GO:0008270
PDE_04621		Copper-fist domain-containing protein	PF00649;	IPR001083;IPR036395;	GO:0003677; GO:0003700; GO:0005507; GO:0005634
PDE_04626		Zn(2)-C6 fungal-type domain-containing protein	PF04082;PF00172;	IPR007219;IPR001138;IPR036864;	GO:0000981; GO:0003677; GO:0005634; GO:0006351; GO:0008270
PDE_04633		BHLH domain-containing protein	PF09427;PF00010;	IPR011598;IPR036638;IPR019006;	GO:0032933; GO:0046983
PDE_04678		Zn(2)-C6 fungal-type domain-containing protein	PF04082;PF00172;	IPR007219;IPR001138;IPR036864;	GO:0000981; GO:0003677; GO:0005634; GO:0006351; GO:0008270
PDE_04690		Uncharacterized protein	PF00498;PF00250;	IPR000253;IPR001766;IPR008984;IPR036388;IPR036390;	GO:0003700; GO:0005634; GO:0043565
PDE_04699		Uncharacterized protein	PF00076;	IPR012677;IPR035979;IPR000504;	GO:0003723
PDE_04702		Uncharacterized protein	PF00352;	IPR000814;IPR030491;IPR012295;IPR033710;	GO:0003677; GO:0006352
PDE_04706		Zn(2)-C6 fungal-type domain-containing protein	PF04082;PF00172;	IPR007219;IPR001138;IPR036864;	GO:0000981; GO:0003677; GO:0005634; GO:0006351; GO:0008270
PDE_04733		Zn(2)-C6 fungal-type domain-containing protein	PF00172;	IPR001138;IPR036864;	GO:0000981; GO:0005634; GO:0008270
PDE_04763		ARID domain-containing protein	PF01388;	IPR001606;IPR036431;	GO:0003677; GO:0005634
PDE_04782		Uncharacterized protein	PF00172;	IPR001138;IPR036864;IPR013087;	GO:0000981; GO:0003676; GO:0005634; GO:0008270
PDE_04795		HMG box domain-containing protein	PF00505;	IPR009071;IPR036910;	GO:0003677; GO:0005634
PDE_04884		CP2 domain-containing protein	PF04516;	IPR007604;IPR040167;	GO:0003700; GO:0006357
PDE_04896		C2H2-type domain-containing protein	PF00096;	IPR036236;IPR013087;	GO:0003676
PDE_04903		BZIP domain-containing protein	PF11786;PF11787;PF11785;PF00170;	IPR004827;IPR002112;IPR021755;IPR021756;IPR020956;	GO:0003677; GO:0003700
PDE_04912		Zn(2)-C6 fungal-type domain-containing protein	PF00172;	IPR001138;IPR036864;	GO:0000981; GO:0005634; GO:0008270
PDE_04927		Zn(2)-C6 fungal-type domain-containing protein	PF04082;PF00172;	IPR007219;IPR001138;IPR036864;	GO:0000981; GO:0003677; GO:0005634; GO:0006351; GO:0008270
PDE_04931		Homeobox domain-containing protein	PF00046;	IPR009057;IPR017970;IPR001356;	GO:0005634; GO:0006355; GO:0043565
PDE_04973		RRM domain-containing protein	PF00076;	IPR012677;IPR035979;IPR000504;	GO:0003723
PDE_04982		Zn(2)-C6 fungal-type domain-containing protein	PF11951;PF00172;	IPR021858;IPR001138;IPR036864;	GO:0000981; GO:0005634; GO:0008270
PDE_04999		RRM domain-containing protein	PF00076;	IPR012677;IPR035979;IPR000504;	GO:0003723
PDE_05006		Uncharacterized protein	PF00096;	IPR036236;IPR013087;	GO:0003676
PDE_05021		Zn(2)-C6 fungal-type domain-containing protein	PF04082;PF00172;	IPR007219;IPR001138;IPR036864;	GO:0000981; GO:0003677; GO:0005634; GO:0006351; GO:0008270
PDE_05025		Uncharacterized protein	PF00076;PF16842;	IPR003107;IPR012677;IPR034397;IPR034398;IPR035979;IPR000504;IPR031766;IPR011990;	GO:0003723; GO:0006396
PDE_05036		BZIP domain-containing protein		IPR004827;	GO:0003700
PDE_05043		Zn(2)-C6 fungal-type domain-containing protein	PF11951;PF00172;	IPR021858;IPR001138;IPR036864;	GO:0000981; GO:0005634; GO:0008270
PDE_05054		Zn(2)-C6 fungal-type domain-containing protein	PF04082;PF00172;	IPR007219;IPR001138;IPR036864;	GO:0000981; GO:0003677; GO:0005634; GO:0006351; GO:0008270
PDE_05162		Uncharacterized protein	PF00498;PF00250;	IPR000253;IPR001766;IPR008984;IPR018122;IPR030456;IPR036388;IPR036390;	GO:0003700; GO:0005634; GO:0043565
PDE_05163		Uncharacterized protein	PF00096;	IPR036236;IPR013087;	GO:0003676
PDE_05166		Zn(2)-C6 fungal-type domain-containing protein	PF04082;PF00172;	IPR007219;IPR001138;IPR036864;	GO:0000981; GO:0003677; GO:0005634; GO:0006351; GO:0008270; GO:0016021
PDE_05199		BZIP domain-containing protein	PF07716;	IPR004827;	GO:0003700
PDE_05246		Uncharacterized protein	PF00249;	IPR009057;IPR017877;IPR015495;IPR017930;IPR001005;	GO:0003677
PDE_05251		Uncharacterized protein		IPR009057;IPR017877;IPR015495;IPR017930;IPR001005;	GO:0003677
PDE_05254		Fork-head domain-containing protein	PF00250;	IPR001766;IPR030456;IPR036388;IPR036390;	GO:0003700; GO:0005634; GO:0043565
PDE_05274		Zn(2)-C6 fungal-type domain-containing protein	PF00172;	IPR001138;IPR036864;	GO:0000981; GO:0005634; GO:0008270
PDE_05277		RRM domain-containing protein	PF00076;	IPR012677;IPR035979;IPR000504;IPR033744;	GO:0003729
PDE_05297		Zn(2)-C6 fungal-type domain-containing protein	PF04082;PF00172;	IPR007219;IPR001138;IPR036864;	GO:0000981; GO:0003677; GO:0005634; GO:0006351; GO:0008270
PDE_05300		Zn(2)-C6 fungal-type domain-containing protein	PF04082;PF00172;	IPR007219;IPR001138;IPR036864;	GO:0000981; GO:0003677; GO:0005634; GO:0006351; GO:0008270
PDE_05336		Zn(2)-C6 fungal-type domain-containing protein	PF00172;	IPR001138;IPR036864;	GO:0000981; GO:0005634; GO:0008270
PDE_05371		C2H2-type domain-containing protein		IPR013087;	GO:0003676
PDE_05378		Zn(2)-C6 fungal-type domain-containing protein	PF04082;PF00172;	IPR007219;IPR001138;IPR036864;	GO:0000981; GO:0003677; GO:0005634; GO:0006351; GO:0008270
PDE_05394		BZIP domain-containing protein	PF00170;	IPR004827;	GO:0003700
PDE_05411		Uncharacterized protein		IPR009057;IPR017877;IPR017930;IPR001005;	GO:0003677
PDE_05430		Fungal_trans domain-containing protein	PF04082;	IPR007219;IPR001138;IPR036864;	GO:0000981; GO:0003677; GO:0005634; GO:0006351; GO:0008270
PDE_05453		Zn(2)-C6 fungal-type domain-containing protein	PF11951;PF00172;	IPR021858;IPR001138;IPR036864;	GO:0000981; GO:0005634; GO:0008270
PDE_05486		Uncharacterized protein	PF00096;	IPR036236;IPR013087;	GO:0003676
PDE_05530		BRCT domain-containing protein		IPR017956;IPR001357;IPR036420;IPR022047;	GO:0003677
PDE_05545		BZIP domain-containing protein		IPR004827;	GO:0003700
PDE_05549		EVE domain-containing protein	PF02178;PF01878;	IPR017956;IPR002740;IPR000116;IPR000637;IPR015947;	GO:0000785; GO:0003677; GO:0005634; GO:0006355
PDE_05602		BZIP domain-containing protein	PF00170;	IPR004827;	GO:0003700
PDE_05627		Zn(2)-C6 fungal-type domain-containing protein	PF00172;	IPR001138;IPR036864;	GO:0000981; GO:0005634; GO:0008270
PDE_05643		Zn(2)-C6 fungal-type domain-containing protein	PF11951;PF00172;	IPR021858;IPR001138;IPR036864;	GO:0000981; GO:0005634; GO:0008270
PDE_05681		Zn(2)-C6 fungal-type domain-containing protein	PF11951;PF00172;	IPR021858;IPR001138;IPR036864;	GO:0000981; GO:0005634; GO:0008270
PDE_05740		Zn(2)-C6 fungal-type domain-containing protein	PF00172;	IPR001138;IPR036864;	GO:0000981; GO:0005634; GO:0008270
PDE_05741		Homeobox domain-containing protein	PF00046;	IPR009057;IPR001356;	GO:0003677; GO:0005634
PDE_05764		HSF_DOMAIN domain-containing protein	PF00447;	IPR000232;IPR027725;IPR036388;IPR036390;	GO:0003700; GO:0005634; GO:0043565
PDE_05804		RRM domain-containing protein	PF00076;	IPR012677;IPR035979;IPR034201;IPR000504;	GO:0003723
PDE_05815		HTH psq-type domain-containing protein	PF05225;	IPR009057;IPR007889;	GO:0003677
PDE_05861		Uncharacterized protein	PF00076;	IPR012677;IPR035979;IPR000504;	GO:0003723
PDE_05868		Peptidyl-prolyl cis-trans isomerase (PPIase) (EC 5.2.1.8)	PF00160;PF00076;	IPR035542;IPR029000;IPR002130;IPR035538;IPR012677;IPR035979;IPR000504;	GO:0003723; GO:0003755; GO:0005634
PDE_05870		Zn(2)-C6 fungal-type domain-containing protein	PF00172;	IPR001138;IPR036864;	GO:0000981; GO:0005634; GO:0008270
PDE_05896		Zn(2)-C6 fungal-type domain-containing protein	PF11951;PF00172;	IPR021858;IPR001138;IPR036864;	GO:0000981; GO:0005634; GO:0008270
PDE_05925		Zn(2)-C6 fungal-type domain-containing protein	PF04082;PF00172;	IPR007219;IPR001138;IPR036864;	GO:0000981; GO:0003677; GO:0005634; GO:0006351; GO:0008270
PDE_05926		Zn(2)-C6 fungal-type domain-containing protein	PF04082;PF00172;	IPR007219;IPR001138;IPR036864;	GO:0000981; GO:0003677; GO:0005634; GO:0006351; GO:0008270
PDE_05927		Uncharacterized protein	PF02178;	IPR017956;IPR039959;	GO:0003677; GO:0051015; GO:0051017
PDE_05962		Zn(2)-C6 fungal-type domain-containing protein	PF11951;PF00172;	IPR021858;IPR001138;IPR036864;	GO:0000981; GO:0005634; GO:0008270
PDE_05963		Zn(2)-C6 fungal-type domain-containing protein	PF00172;	IPR001138;IPR036864;	GO:0000981; GO:0005634; GO:0008270
PDE_05999		Cellulolytic transcriptional activator ClrB	PF04082;PF00172;	IPR007219;IPR001138;IPR036864;	GO:0000981; GO:0003677; GO:0005634; GO:0006351; GO:0008270
PDE_06006		Uncharacterized protein	PF04082;PF00096;	IPR007219;IPR001138;IPR036864;IPR036236;IPR013087;	GO:0000981; GO:0003677; GO:0005634; GO:0006351; GO:0008270
PDE_06037		Uncharacterized protein		IPR009057;IPR001005;	GO:0003677
PDE_06057		Fungal_trans domain-containing protein	PF04082;	IPR007219;IPR001138;IPR036864;	GO:0000981; GO:0003677; GO:0005634; GO:0006351; GO:0008270
PDE_06085		Zn(2)-C6 fungal-type domain-containing protein	PF04082;PF00172;	IPR007219;IPR001138;IPR036864;	GO:0000981; GO:0003677; GO:0005634; GO:0006351; GO:0008270
PDE_06088		Zn(2)-C6 fungal-type domain-containing protein	PF04082;PF00172;	IPR007219;IPR001138;IPR036864;	GO:0000981; GO:0003677; GO:0005634; GO:0006351; GO:0008270
PDE_06105		BZIP domain-containing protein	PF07716;	IPR004827;	GO:0003700
PDE_06148		Uncharacterized protein	PF01585;PF00076;	IPR000467;IPR012677;IPR035979;IPR040052;IPR000504;	GO:0003723; GO:0043484
PDE_06151		Uncharacterized protein	PF00627;	IPR015940;IPR009060;IPR029071;IPR013087;	GO:0003676
PDE_06160		RRM domain-containing protein	PF00076;	IPR012677;IPR035979;IPR000504;IPR034150;	GO:0003723
PDE_06180		Zn(2)-C6 fungal-type domain-containing protein	PF04082;PF00172;	IPR007219;IPR001138;IPR036864;	GO:0000981; GO:0003677; GO:0005634; GO:0006351; GO:0008270
PDE_06196		Uncharacterized protein	PF00076;	IPR037366;IPR034156;IPR012677;IPR035979;IPR000504;	GO:0003729
PDE_06204		Uncharacterized protein	PF04082;PF00096;PF00172;	IPR007219;IPR001138;IPR036864;IPR036236;IPR013087;	GO:0000981; GO:0003677; GO:0005634; GO:0006351; GO:0008270
PDE_06238		Zn(2)-C6 fungal-type domain-containing protein	PF11951;PF00172;	IPR021858;IPR001138;IPR036864;	GO:0000981; GO:0005634; GO:0008270; GO:0016021
PDE_06276		Uncharacterized protein	PF00076;PF04146;	IPR012677;IPR035979;IPR000504;IPR007275;	GO:0003723
PDE_06342		Zn(2)-C6 fungal-type domain-containing protein	PF11951;PF00172;	IPR021858;IPR001138;IPR036864;	GO:0000981; GO:0005634; GO:0008270
PDE_06349		C3H1-type domain-containing protein	PF13086;PF13087;PF18044;	IPR041679;IPR041677;IPR027417;IPR041367;IPR000571;IPR036855;IPR000967;	GO:0003700; GO:0005634; GO:0008270
PDE_06375		BHLH domain-containing protein	PF00010;	IPR011598;IPR036638;IPR037933;	GO:0046983; GO:0071339; GO:0090575
PDE_06383		Uncharacterized protein	PF02045;	IPR001289;	GO:0003700
PDE_06385		C2H2-type domain-containing protein	PF04959;PF12066;PF13821;	IPR025239;IPR039249;IPR007042;IPR021933;IPR013087;	GO:0003676
PDE_06431		Zn(2)-C6 fungal-type domain-containing protein	PF00172;	IPR001138;IPR036864;	GO:0000981; GO:0005634; GO:0008270
PDE_06455		Uncharacterized protein	PF00642;	IPR000571;IPR036855;	GO:0046872
PDE_06458		BZIP domain-containing protein	PF07716;	IPR004827;	GO:0003700
PDE_06483		Zn(2)-C6 fungal-type domain-containing protein	PF04082;PF00172;	IPR007219;IPR001138;IPR036864;	GO:0000981; GO:0003677; GO:0005634; GO:0006351; GO:0008270
PDE_06484		Uncharacterized protein	PF00076;	IPR012677;IPR035979;IPR000504;	GO:0003723
PDE_06517		Uncharacterized protein		IPR036236;IPR013087;	GO:0003676
PDE_06572		Zn(2)-C6 fungal-type domain-containing protein	PF00172;	IPR001138;IPR036864;	GO:0000981; GO:0005634; GO:0008270
PDE_06578		HTH CENPB-type domain-containing protein	PF03184;PF05225;PF03221;	IPR004875;IPR009057;IPR006600;IPR007889;	GO:0003677
PDE_06635		Zn(2)-C6 fungal-type domain-containing protein		IPR001138;IPR036864;	GO:0000981; GO:0005634; GO:0008270
PDE_06651		Zn(2)-C6 fungal-type domain-containing protein	PF04082;PF00172;	IPR007219;IPR001138;IPR036864;	GO:0000981; GO:0003677; GO:0005634; GO:0006351; GO:0008270
PDE_06660		Zn(2)-C6 fungal-type domain-containing protein	PF11951;PF00172;	IPR021858;IPR001138;IPR036864;	GO:0000981; GO:0005634; GO:0008270
PDE_06695		Uncharacterized protein		IPR013087;	GO:0003676
PDE_06696		C2H2-type domain-containing protein		IPR036236;IPR013087;	GO:0003676
PDE_06698		HMG box domain-containing protein	PF00505;	IPR009071;IPR036910;	GO:0003677; GO:0005634
PDE_06747		C2H2-type domain-containing protein		IPR013087;	GO:0003676
PDE_06784		Zn(2)-C6 fungal-type domain-containing protein	PF00172;	IPR001138;IPR036864;	GO:0000981; GO:0005634; GO:0008270
PDE_06843		Zn(2)-C6 fungal-type domain-containing protein	PF14602;PF12464;PF00172;	IPR001451;IPR024688;IPR011004;IPR001138;IPR036864;	GO:0000981; GO:0005634; GO:0008270; GO:0016407
PDE_06845		Uncharacterized protein	PF00172;	IPR001138;IPR036864;IPR036236;IPR013087;	GO:0000981; GO:0003676; GO:0005634; GO:0008270
PDE_06847		Uncharacterized protein	PF00096;	IPR036236;IPR013087;	GO:0003676
PDE_06878		Zn(2)-C6 fungal-type domain-containing protein	PF04082;PF00172;	IPR007219;IPR001138;IPR036864;	GO:0000981; GO:0003677; GO:0005634; GO:0006351; GO:0008270
PDE_06888		Zn(2)-C6 fungal-type domain-containing protein	PF04082;PF00172;	IPR007219;IPR001138;IPR036864;	GO:0000981; GO:0003677; GO:0005634; GO:0006351; GO:0008270
PDE_06904		Uncharacterized protein	PF10378;PF00076;	IPR039171;IPR034195;IPR012677;IPR035979;IPR018835;IPR000504;	GO:0000398; GO:0003723
PDE_06913		Fungal_trans domain-containing protein	PF04082;	IPR007219;IPR001138;IPR036864;	GO:0000981; GO:0003677; GO:0005634; GO:0006351; GO:0008270
PDE_06920		Uncharacterized protein	PF00806;PF00076;	IPR011989;IPR016024;IPR012677;IPR033133;IPR001313;IPR035979;IPR000504;	GO:0003723
PDE_06927		Uncharacterized protein	PF11831;	IPR021786;IPR009057;IPR017930;IPR001005;	GO:0003677
PDE_06947		Zn(2)-C6 fungal-type domain-containing protein	PF04082;PF00172;	IPR007219;IPR001138;IPR036864;	GO:0000981; GO:0003677; GO:0005634; GO:0006351; GO:0008270
PDE_06948		Fungal_trans domain-containing protein	PF04082;	IPR007219;IPR001138;	GO:0000981; GO:0003677; GO:0005634; GO:0006351; GO:0008270
PDE_06962		Zn(2)-C6 fungal-type domain-containing protein	PF04082;PF00172;	IPR007219;IPR001138;IPR036864;	GO:0000981; GO:0003677; GO:0005634; GO:0006351; GO:0008270
PDE_07001		Zn(2)-C6 fungal-type domain-containing protein	PF04082;PF00172;	IPR007219;IPR001138;IPR036864;	GO:0000981; GO:0003677; GO:0005634; GO:0006351; GO:0008270; GO:0016021
PDE_07022		RRM domain-containing protein	PF00076;	IPR012677;IPR035979;IPR000504;	GO:0003723
PDE_07029		Zn(2)-C6 fungal-type domain-containing protein	PF11951;PF00172;	IPR021858;IPR001138;IPR036864;	GO:0000981; GO:0005634; GO:0008270
PDE_07053		BHLH domain-containing protein	PF00010;	IPR011598;IPR036638;	GO:0046983
PDE_07094		Uncharacterized protein	PF00096;	IPR036236;IPR013087;	GO:0003676
PDE_07097		HMG box domain-containing protein	PF00505;	IPR009071;IPR036910;	GO:0003677; GO:0005634
PDE_07134		Uncharacterized protein	PF00096;	IPR036236;IPR013087;	GO:0003676
PDE_07149		Uncharacterized protein		IPR036236;IPR013087;	GO:0003676
PDE_07172		Zn(2)-C6 fungal-type domain-containing protein	PF04082;PF00172;	IPR007219;IPR001138;IPR036864;	GO:0000981; GO:0003677; GO:0005634; GO:0006351; GO:0008270; GO:0016021
PDE_07174		Zn(2)-C6 fungal-type domain-containing protein		IPR001138;IPR036864;	GO:0000981; GO:0005634; GO:0008270
PDE_07184		Uncharacterized protein		IPR001138;	GO:0000981; GO:0005634; GO:0008270
PDE_07199		Homeobox domain-containing protein	PF00046;	IPR009057;IPR017970;IPR001356;	GO:0005634; GO:0006355; GO:0043565
PDE_07215		Zn(2)-C6 fungal-type domain-containing protein	PF11951;PF00172;	IPR021858;IPR001138;IPR036864;	GO:0000981; GO:0005634; GO:0008270
PDE_07240		Zn(2)-C6 fungal-type domain-containing protein	PF04082;PF00172;	IPR007219;IPR001138;IPR036864;	GO:0000981; GO:0003677; GO:0005634; GO:0006351; GO:0008270
PDE_07250		Zn(2)-C6 fungal-type domain-containing protein	PF11951;PF00172;	IPR021858;IPR001138;IPR036864;	GO:0000981; GO:0005634; GO:0008270
PDE_07327		RRM domain-containing protein	PF00076;PF12220;	IPR012677;IPR035979;IPR000504;IPR040252;IPR034143;IPR022023;	GO:0000398; GO:0005685; GO:0030619
PDE_07338		Zn(2)-C6 fungal-type domain-containing protein	PF00172;	IPR001138;IPR036864;	GO:0000981; GO:0005634; GO:0008270
PDE_07343		Zn(2)-C6 fungal-type domain-containing protein	PF00172;	IPR001138;IPR036864;	GO:0000981; GO:0005634; GO:0008270
PDE_07378		Zn(2)-C6 fungal-type domain-containing protein	PF11951;PF00172;	IPR021858;IPR001138;IPR036864;	GO:0000981; GO:0005634; GO:0008270
PDE_07392		BZIP domain-containing protein	PF00170;	IPR004827;IPR002112;	GO:0003677; GO:0003700
PDE_07487		Zn(2)-C6 fungal-type domain-containing protein	PF04082;PF00172;	IPR007219;IPR001138;IPR036864;	GO:0000981; GO:0003677; GO:0005634; GO:0006351; GO:0008270
PDE_07489		Uncharacterized protein	PF04082;PF00172;	IPR007219;IPR001138;IPR036864;IPR036236;IPR013087;	GO:0000981; GO:0003677; GO:0005634; GO:0006351; GO:0008270
PDE_07492		Zn(2)-C6 fungal-type domain-containing protein	PF04082;PF00172;	IPR007219;IPR001138;IPR036864;	GO:0000981; GO:0003677; GO:0005634; GO:0006351; GO:0008270
PDE_07501		Uncharacterized protein	PF00076;	IPR012677;IPR035979;IPR000504;	GO:0003723
PDE_07533		Uncharacterized protein		IPR036236;IPR013087;	GO:0003676
PDE_07546		HTH myb-type domain-containing protein	PF08558;	IPR009057;IPR017930;IPR001005;IPR013867;	GO:0042162; GO:0042803
PDE_07554		HTH APSES-type domain-containing protein		IPR037548;IPR036887;IPR018004;IPR003163;	GO:0003677; GO:0005623; GO:0070197; GO:1990862
PDE_07588		Uncharacterized protein	PF00320;	IPR039355;IPR000679;IPR013088;	GO:0003700; GO:0005634; GO:0008270; GO:0043565
PDE_07596		Zn(2)-C6 fungal-type domain-containing protein	PF11951;	IPR021858;IPR001138;IPR036864;	GO:0000981; GO:0005634; GO:0008270
PDE_07624		Zn(2)-C6 fungal-type domain-containing protein	PF11951;	IPR021858;IPR001138;IPR036864;	GO:0000981; GO:0005634; GO:0008270
PDE_07628		RRM domain-containing protein	PF13865;PF00076;	IPR025715;IPR012677;IPR035979;IPR000504;	GO:0003723
PDE_07631		Uncharacterized protein	PF16543;	IPR032378;IPR000571;IPR036855;	GO:0046872
PDE_07674		Xylanolytic and cellulolytic transcriptional activator XlnR	PF04082;PF00172;	IPR007219;IPR001138;IPR036864;	GO:0000981; GO:0003677; GO:0005634; GO:0006351; GO:0008270
PDE_07712		Zn(2)-C6 fungal-type domain-containing protein	PF00172;	IPR001138;IPR036864;	GO:0000981; GO:0005634; GO:0008270
PDE_07722		BZIP domain-containing protein	PF07716;	IPR004827;	GO:0003700
PDE_07744		Uncharacterized protein		IPR000571;	GO:0046872
PDE_07750		Zn(2)-C6 fungal-type domain-containing protein		IPR001138;IPR036864;	GO:0000981; GO:0005634; GO:0008270
PDE_07758		Uncharacterized protein	PF04082;	IPR007219;IPR036236;IPR013087;	GO:0003677; GO:0005634; GO:0006351; GO:0008270
PDE_07770		RRM domain-containing protein	PF00076;	IPR012677;IPR035979;IPR000504;	GO:0003723
PDE_07881		Uncharacterized protein	PF04082;PF00096;	IPR007219;IPR036236;IPR013087;	GO:0003677; GO:0005634; GO:0006351; GO:0008270
PDE_07887		Zn(2)-C6 fungal-type domain-containing protein	PF04082;PF00172;	IPR007219;IPR001138;IPR036864;	GO:0000981; GO:0003677; GO:0005634; GO:0006351; GO:0008270
PDE_07942		Zn(2)-C6 fungal-type domain-containing protein	PF11951;PF00172;	IPR021858;IPR001138;IPR036864;	GO:0000981; GO:0005634; GO:0008270
PDE_07954		RRM domain-containing protein	PF00076;PF03467;	IPR012677;IPR035979;IPR000504;IPR039722;IPR005120;	GO:0000184; GO:0003723
PDE_07955		Zn(2)-C6 fungal-type domain-containing protein	PF04082;PF00172;	IPR007219;IPR001138;IPR036864;	GO:0000981; GO:0003677; GO:0005634; GO:0006351; GO:0008270
PDE_07971		Uncharacterized protein		IPR013087;	GO:0003676
PDE_07973		Zn(2)-C6 fungal-type domain-containing protein	PF04082;PF00172;	IPR007219;IPR001138;IPR036864;	GO:0000981; GO:0003677; GO:0005634; GO:0006351; GO:0008270
PDE_07980		Uncharacterized protein	PF00096;	IPR036236;IPR013087;	GO:0003676
PDE_07989		Zn(2)-C6 fungal-type domain-containing protein		IPR001138;IPR036864;	GO:0000981; GO:0005634; GO:0008270
PDE_07995		Uncharacterized protein	PF00076;	IPR012677;IPR035979;IPR000504;	GO:0003723
PDE_08025		Zn(2)-C6 fungal-type domain-containing protein	PF11951;PF00172;	IPR021858;IPR001138;IPR036864;	GO:0000981; GO:0005634; GO:0008270
PDE_08048		Zn(2)-C6 fungal-type domain-containing protein	PF04082;PF00172;	IPR007219;IPR001138;IPR036864;	GO:0000981; GO:0003677; GO:0005634; GO:0006351; GO:0008270
PDE_08065		Zn(2)-C6 fungal-type domain-containing protein	PF11951;PF00172;	IPR021858;IPR001138;IPR036864;	GO:0000981; GO:0005634; GO:0008270
PDE_08084		Zn(2)-C6 fungal-type domain-containing protein	PF00172;	IPR001138;IPR036864;	GO:0000981; GO:0005634; GO:0008270
PDE_08184		C2H2-type domain-containing protein	PF12171;	IPR003604;IPR022755;IPR036236;IPR013087;	GO:0003676; GO:0008270
PDE_08232		Response regulatory domain-containing protein	PF00447;PF00072;	IPR011006;IPR000232;IPR027725;IPR001789;IPR014402;IPR036388;IPR036390;	GO:0000156; GO:0003700; GO:0005634; GO:0043565
PDE_08253		Zn(2)-C6 fungal-type domain-containing protein	PF00172;	IPR007219;IPR001138;IPR036864;	GO:0000981; GO:0003677; GO:0005634; GO:0006351; GO:0008270
PDE_08259		Uncharacterized protein	PF00076;	IPR012677;IPR035979;IPR000504;	GO:0003723
PDE_08282		Uncharacterized protein		IPR036236;IPR013087;	GO:0003676
PDE_08304		Uncharacterized protein	PF09110;PF00271;PF09111;PF00176;	IPR014001;IPR001650;IPR009057;IPR015194;IPR036306;IPR027417;IPR001005;IPR017884;IPR015195;IPR038718;IPR000330;	GO:0003677; GO:0005524; GO:0005634; GO:0016818; GO:0031491; GO:0043044
PDE_08309		C3H1-type domain-containing protein		IPR000571;	GO:0046872
PDE_08350		Uncharacterized protein	PF08590;PF01713;	IPR013899;IPR002625;IPR036063;IPR000571;IPR036855;	GO:0046872
PDE_08352		Uncharacterized protein	PF01593;PF04433;	IPR002937;IPR036188;IPR009071;IPR036910;IPR009057;IPR007526;IPR036388;	GO:0003677; GO:0005634; GO:0016491
PDE_08372		Uncharacterized protein	PF00096;	IPR036236;IPR013087;	GO:0003676
PDE_08428		Zn(2)-C6 fungal-type domain-containing protein		IPR001138;IPR036864;	GO:0000981; GO:0005634; GO:0008270
PDE_08441		Zn(2)-C6 fungal-type domain-containing protein	PF04082;PF00172;	IPR007219;IPR001138;IPR036864;	GO:0000981; GO:0003677; GO:0005634; GO:0006351; GO:0008270
PDE_08462		Uncharacterized protein	PF00096;	IPR036236;IPR013087;	GO:0003676
PDE_08488		BZIP domain-containing protein	PF07716;	IPR004827;	GO:0003700
PDE_08506		HMG box domain-containing protein	PF00505;	IPR009071;IPR036910;	GO:0003677; GO:0005634
PDE_08526		Zn(2)-C6 fungal-type domain-containing protein	PF04082;PF00172;	IPR007219;IPR001138;IPR036864;	GO:0000981; GO:0003677; GO:0005634; GO:0006351; GO:0008270
PDE_08558		Zn(2)-C6 fungal-type domain-containing protein	PF00172;	IPR001138;IPR036864;	GO:0000981; GO:0005634; GO:0008270
PDE_08568		Fungal_trans domain-containing protein	PF04082;PF00172;	IPR007219;IPR001138;IPR036864;	GO:0000981; GO:0003677; GO:0005634; GO:0006351; GO:0008270; GO:0016021
PDE_08587		Zn(2)-C6 fungal-type domain-containing protein	PF04082;PF00172;	IPR007219;IPR001138;IPR036864;	GO:0000981; GO:0003677; GO:0005634; GO:0006351; GO:0008270
PDE_08589		Zn(2)-C6 fungal-type domain-containing protein	PF04082;PF00172;	IPR007219;IPR001138;IPR036864;	GO:0000981; GO:0003677; GO:0005634; GO:0006351; GO:0008270
PDE_08612		Uncharacterized protein	PF00320;PF08447;	IPR000014;IPR035965;IPR013655;IPR000679;IPR013088;	GO:0006355; GO:0008270; GO:0043565
PDE_08646		C2H2-type domain-containing protein	PF04082;	IPR007219;IPR036236;IPR013087;	GO:0003677; GO:0005634; GO:0006351; GO:0008270
PDE_08648		Uncharacterized protein	PF01480;PF00076;	IPR012677;IPR002483;IPR036483;IPR035979;IPR000504;IPR000571;	GO:0003723; GO:0006397; GO:0046872
PDE_08667		GATA-type domain-containing protein	PF00320;	IPR039355;IPR000679;IPR013088;	GO:0003700; GO:0005634; GO:0008270; GO:0043565
PDE_08716		RRM domain-containing protein	PF00076;	IPR012677;IPR034168;IPR035979;IPR000504;	GO:0003723
PDE_08808		RING-type domain-containing protein	PF00076;	IPR034261;IPR039780;IPR039515;IPR012677;IPR035979;IPR000504;IPR003954;IPR001841;IPR013083;	GO:0003723; GO:0004842; GO:0030014
PDE_08811		Zn(2)-C6 fungal-type domain-containing protein	PF04082;PF00172;	IPR007219;IPR001138;IPR036864;	GO:0000981; GO:0003677; GO:0005634; GO:0006351; GO:0008270
PDE_08861		RRM domain-containing protein	PF00076;	IPR012677;IPR035979;IPR034215;IPR000504;	GO:0003723
PDE_08862		Zn(2)-C6 fungal-type domain-containing protein	PF04082;PF00172;	IPR007219;IPR001138;IPR036864;	GO:0000981; GO:0003677; GO:0005634; GO:0006351; GO:0008270
PDE_08865		RFX-type winged-helix domain-containing protein		IPR016024;IPR003150;	GO:0003677; GO:0006355
PDE_08867		Zn(2)-C6 fungal-type domain-containing protein	PF00172;	IPR001138;IPR036864;	GO:0000981; GO:0005634; GO:0008270
PDE_08869		Copper-fist domain-containing protein	PF00649;	IPR001083;IPR036395;	GO:0003677; GO:0003700; GO:0005507; GO:0005634
PDE_08909		Zn(2)-C6 fungal-type domain-containing protein	PF00172;	IPR001138;IPR036864;	GO:0000981; GO:0005634; GO:0008270
PDE_08922		Zn(2)-C6 fungal-type domain-containing protein	PF04082;PF00172;	IPR007219;IPR001138;IPR036864;	GO:0000981; GO:0003677; GO:0005634; GO:0006351; GO:0008270
PDE_08937		Zn(2)-C6 fungal-type domain-containing protein	PF00172;	IPR001138;IPR036864;	GO:0000981; GO:0005634; GO:0008270
PDE_08983		Zn(2)-C6 fungal-type domain-containing protein	PF04082;PF00172;	IPR007219;IPR001138;IPR036864;	GO:0000981; GO:0003677; GO:0005634; GO:0006351; GO:0008270; GO:0016021
PDE_08984		Zn(2)-C6 fungal-type domain-containing protein	PF00172;	IPR001138;IPR036864;	GO:0000981; GO:0005634; GO:0008270
PDE_09023		BZIP domain-containing protein		IPR004827;	GO:0003700
PDE_09026		Zn(2)-C6 fungal-type domain-containing protein	PF04082;PF00172;	IPR007219;IPR001138;IPR036864;	GO:0000981; GO:0003677; GO:0005634; GO:0006351; GO:0008270
PDE_09032		Uncharacterized protein	PF12756;PF12171;	IPR003604;IPR041661;IPR040025;IPR022755;IPR036236;IPR013087;	GO:0003676; GO:0008270
PDE_09037		Zn(2)-C6 fungal-type domain-containing protein	PF11951;PF00172;	IPR021858;IPR001138;IPR036864;	GO:0000981; GO:0005634; GO:0008270
PDE_09042		Uncharacterized protein	PF00076;	IPR012677;IPR035979;IPR000504;	GO:0003723
PDE_09120		General transcription and DNA repair factor IIH	PF07975;PF04056;	IPR007198;IPR004595;IPR012170;IPR002035;IPR036465;IPR013087;IPR013083;	GO:0000439; GO:0003676; GO:0005675; GO:0006289; GO:0006351; GO:0008270
PDE_09129		BHLH domain-containing protein	PF00010;	IPR011598;IPR036638;	GO:0046983
PDE_09136		Uncharacterized protein	PF04818;PF00076;	IPR006569;IPR008942;IPR012677;IPR035979;IPR006903;IPR000504;	GO:0003723
PDE_09150		Uncharacterized protein	PF02136;PF00076;	IPR002075;IPR032710;IPR018222;IPR012677;IPR039539;IPR035979;IPR000504;	GO:0003723
PDE_09171		RRM domain-containing protein	PF00076;	IPR012677;IPR035979;IPR000504;	GO:0003723
PDE_09176		U2 snRNP auxiliary factor large subunit	PF00076;	IPR012677;IPR035979;IPR000504;IPR003954;IPR006529;	GO:0003723; GO:0005634; GO:0006397; GO:0008380
PDE_09179		Zn(2)-C6 fungal-type domain-containing protein	PF11951;PF00172;	IPR021858;IPR001138;IPR036864;	GO:0000981; GO:0005634; GO:0008270
PDE_09197		Zn(2)-C6 fungal-type domain-containing protein	PF04082;PF00172;	IPR007219;IPR001138;IPR036864;	GO:0000981; GO:0003677; GO:0005634; GO:0006351; GO:0008270
PDE_09243		Zn(2)-C6 fungal-type domain-containing protein	PF08493;PF00172;	IPR013700;IPR001138;IPR036864;	GO:0000981; GO:0003677; GO:0005634; GO:0008270; GO:0045122
PDE_09254		Uncharacterized protein	PF00249;PF04433;PF16495;	IPR009057;IPR041984;IPR001005;IPR017884;IPR032451;IPR007526;IPR036388;	GO:0003677; GO:0005634
PDE_09266		Uncharacterized protein		IPR020683;IPR036770;IPR036887;IPR018004;IPR003163;	GO:0003677
PDE_09307		Uncharacterized protein	PF00076;PF16131;	IPR039173;IPR039171;IPR034181;IPR012677;IPR035979;IPR000504;IPR032297;IPR000571;IPR036855;	GO:0000387; GO:0017070; GO:0036002; GO:0045292; GO:0046872
PDE_09310		Zn(2)-C6 fungal-type domain-containing protein	PF04082;PF00172;	IPR007219;IPR001138;IPR036864;	GO:0000981; GO:0003677; GO:0005634; GO:0006351; GO:0008270
PDE_09318		Uncharacterized protein	PF02200;PF00096;	IPR003120;IPR036236;IPR013087;	GO:0003676; GO:0003700; GO:0005634
PDE_09355		Uncharacterized protein	PF04082;PF00096;	IPR007219;IPR036236;IPR013087;	GO:0003677; GO:0005634; GO:0006351; GO:0008270
PDE_09356		C2H2-type domain-containing protein		IPR039258;IPR013087;	GO:0003676
PDE_09386		C2H2-type domain-containing protein	PF00096;	IPR036236;IPR013087;	GO:0003676
PDE_09423		Uncharacterized protein	PF04082;PF00096;PF00172;	IPR007219;IPR001138;IPR036864;IPR036236;IPR013087;	GO:0000981; GO:0003677; GO:0005634; GO:0006351; GO:0008270
PDE_09448		Zn(2)-C6 fungal-type domain-containing protein	PF04082;PF00172;	IPR007219;IPR001138;IPR036864;	GO:0000981; GO:0003677; GO:0005634; GO:0006351; GO:0008270
PDE_09475		Zn(2)-C6 fungal-type domain-containing protein	PF11951;PF00172;	IPR021858;IPR001138;IPR036864;	GO:0000981; GO:0005634; GO:0008270
PDE_09498		Uncharacterized protein	PF01388;PF02373;PF02375;PF00628;PF08429;PF02928;	IPR001606;IPR036431;IPR003347;IPR003349;IPR013637;IPR019786;IPR004198;IPR011011;IPR001965;IPR019787;IPR013083;	GO:0003677; GO:0005634; GO:0046872
PDE_09536		Zn(2)-C6 fungal-type domain-containing protein	PF04082;PF00172;	IPR007219;IPR001138;IPR036864;	GO:0000981; GO:0003677; GO:0005634; GO:0006351; GO:0008270
PDE_09548		BZIP domain-containing protein	PF10297;	IPR004827;IPR018287;	GO:0003677; GO:0003700; GO:0005634
PDE_09585		BHLH domain-containing protein	PF00010;	IPR011598;IPR036638;	GO:0046983
PDE_09613		RRM domain-containing protein	PF13865;PF00076;	IPR025715;IPR012677;IPR035979;IPR000504;	GO:0003723
PDE_09620		RRM domain-containing protein	PF00076;	IPR012677;IPR035979;IPR000504;	GO:0003723
PDE_09658		Uncharacterized protein	PF00642;	IPR039971;IPR000571;IPR036855;IPR001841;IPR013083;IPR017907;	GO:0046872
PDE_09718		Uncharacterized protein	PF00076;	IPR012677;IPR035979;IPR000504;	GO:0003723
PDE_09744		Uncharacterized protein	PF00249;	IPR009057;IPR017877;IPR015495;IPR017930;IPR001005;	GO:0003677
PDE_09796		Zn(2)-C6 fungal-type domain-containing protein	PF00172;	IPR001138;IPR036864;	GO:0000981; GO:0005634; GO:0008270
PDE_09820		RRM domain-containing protein	PF00076;	IPR012677;IPR035979;IPR000504;	GO:0003723
PDE_09868		Zn(2)-C6 fungal-type domain-containing protein	PF11951;PF00172;	IPR021858;IPR001138;IPR036864;	GO:0000981; GO:0005634; GO:0008270
PDE_09881		Zn(2)-C6 fungal-type domain-containing protein	PF04082;PF00172;	IPR007219;IPR004507;IPR001138;IPR036864;	GO:0000981; GO:0003677; GO:0005634; GO:0006351; GO:0008270
PDE_09905		Matrin-type domain-containing protein	PF11931;PF16837;PF12108;PF12171;	IPR024598;IPR000690;IPR031776;IPR031774;IPR021966;IPR022755;IPR036236;IPR013087;	GO:0000398; GO:0003723; GO:0005681; GO:0008270
PDE_09927		Uncharacterized protein	PF00929;PF00076;PF00641;	IPR013520;IPR034351;IPR012677;IPR035979;IPR012337;IPR036397;IPR000504;IPR001876;IPR036443;	GO:0003723; GO:0046872
PDE_09956		Uncharacterized protein	PF01424;PF00076;	IPR012677;IPR034186;IPR034069;IPR001374;IPR036867;IPR035979;IPR000504;	GO:0003723
PDE_09961		HSF_DOMAIN domain-containing protein	PF00447;	IPR000232;IPR027725;IPR036388;IPR036390;	GO:0003700; GO:0005634; GO:0043565
PDE_09981		SANT domain-containing protein	PF00249;	IPR009057;IPR001005;IPR017884;	GO:0003677; GO:0005634
PDE_09985		Zn(2)-C6 fungal-type domain-containing protein	PF04082;PF00172;	IPR007219;IPR001138;IPR036864;	GO:0000981; GO:0003677; GO:0005634; GO:0006351; GO:0008270
